# Supplementary material for: Simultaneous functioning of different light-harvesting complexes—a strategy of adaptation of purple bacterium Rhodopseudomonas palustris to low illumination conditions
Source: PeerJ journal article supplement (doi:10.7717/peerj.14769), 2023-01-31
Supplement: HPLC_2021-07-27_LH2_OP.pdf [file HPLC_2021-07-27_LH2_OP.pdf]

# ==== Shimadzu LCsolution Analysis Report ====

<3D Graph>

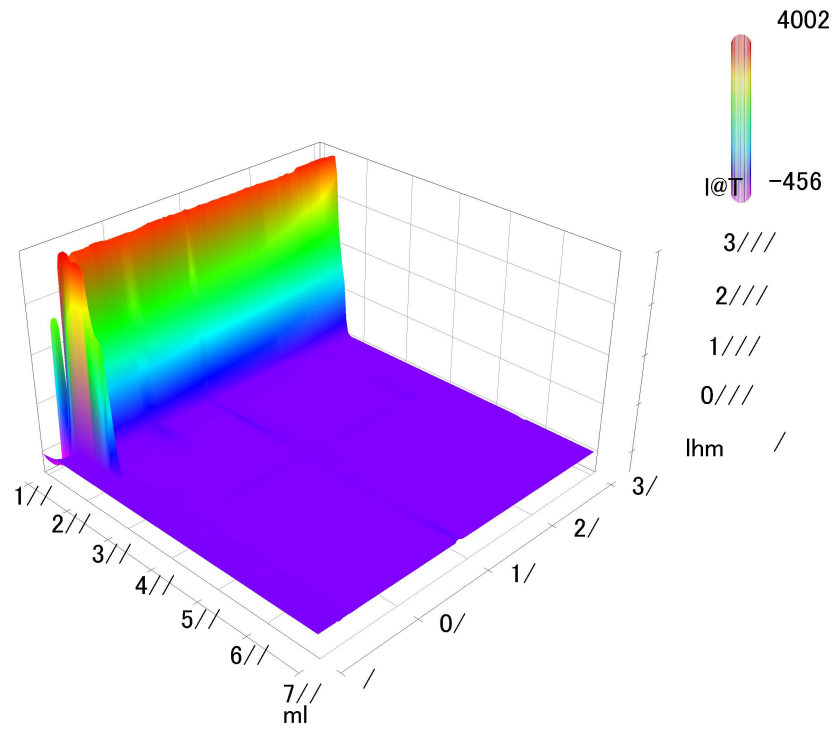

<Contour>

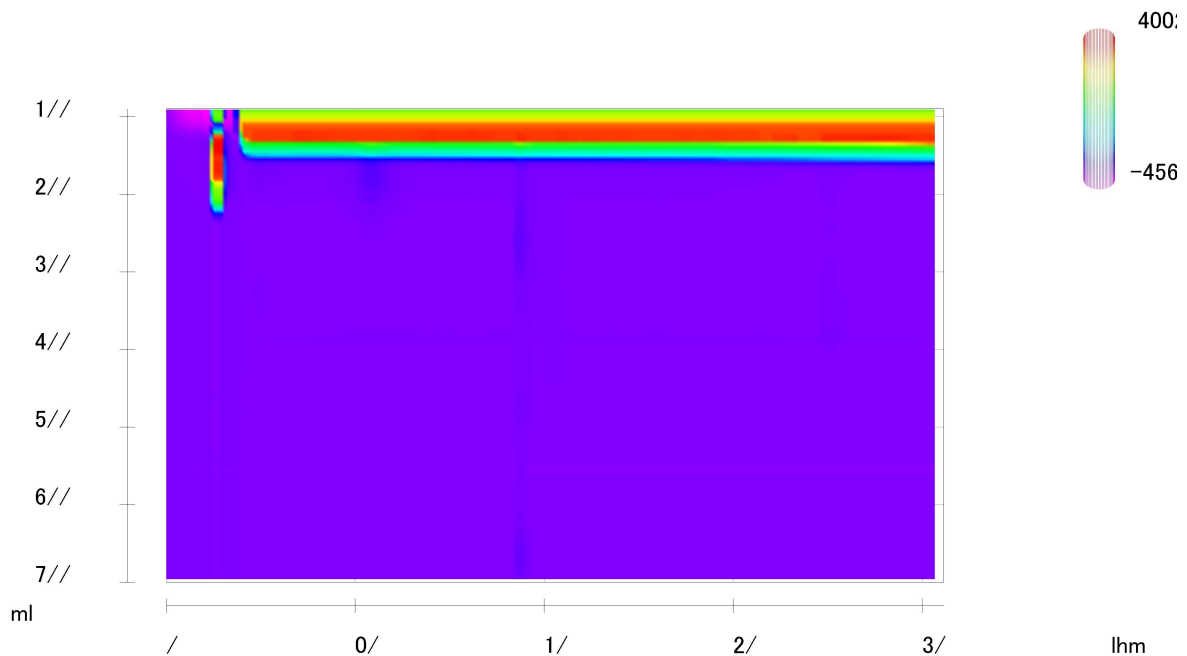

## ==== Shimadzu LCsolution Analysis Report ====

Sample Name : 2021-07-27 LH2 OP  
 Sample ID : 2021-07-27 LH2 OP  
 Operator : Admin  
 Data File Name : F:\Sascha BЭЖX\2021 BЭЖX\2021-07-27 LH2 OP.lcd  
 Method File Name : F:\Method\190-800.lcm  
 Batch File Name :  
 Report File Name : Default.lcr  
 Acquisition Date : 21/07/27 10:54:54  
 Modified Date : 22/05/22 23:49:11

### <Chromatogram>

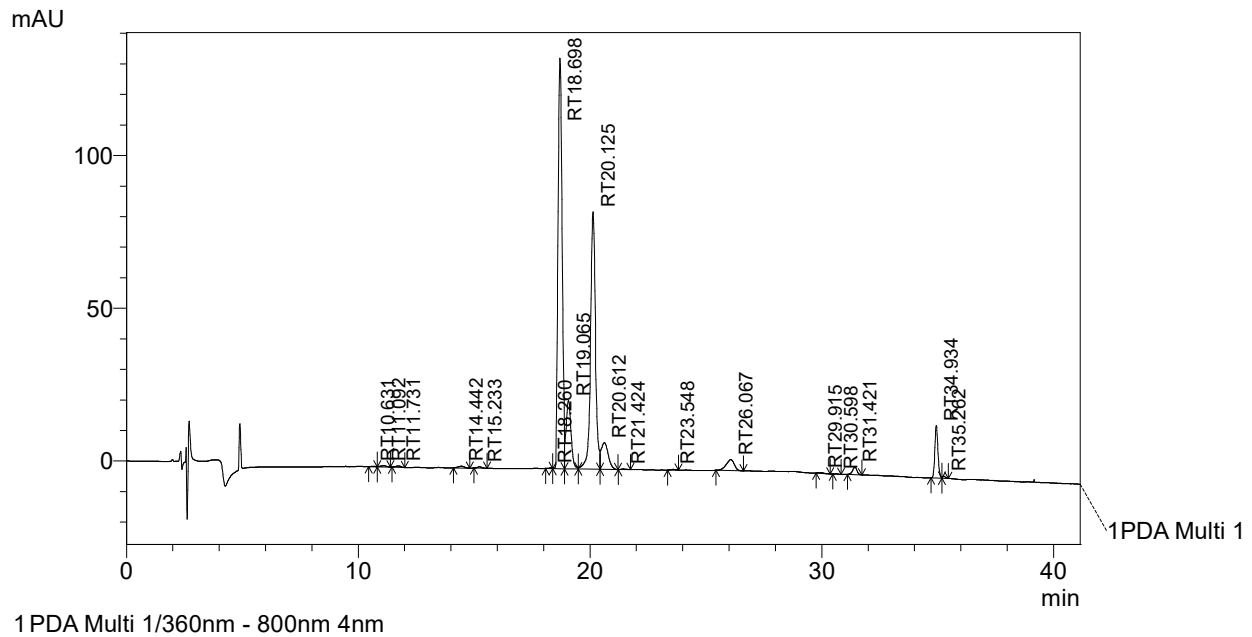

### <Results>

PDA

| ID# | Name     | Ret. Time | Area    | Minimum Peak Purity Inde | Conc. | Units |
|-----|----------|-----------|---------|--------------------------|-------|-------|
| 1   | RT10.631 | 10.631    | 2472    | Not calculated           | 0.000 | mg/L  |
| 2   | RT11.092 | 11.092    | 7170    | Not calculated           | 0.000 | mg/L  |
| 3   | RT11.731 | 11.731    | 6722    | Not calculated           | 0.000 | mg/L  |
| 4   | RT14.442 | 14.442    | 10699   | Not calculated           | 0.000 | mg/L  |
| 5   | RT15.233 | 15.233    | 6513    | Not calculated           | 0.000 | mg/L  |
| 6   | RT18.260 | 18.260    | 2436    | Not calculated           | 0.000 | mg/L  |
| 7   | RT18.698 | 18.698    | 1675625 | Not calculated           | 0.000 | mg/L  |
| 8   | RT19.065 | 19.065    | 333457  | Not calculated           | 0.000 | mg/L  |
| 9   | RT20.125 | 20.125    | 1256682 | Not calculated           | 0.000 | mg/L  |
| 10  | RT20.612 | 20.612    | 183818  | Not calculated           | 0.000 | mg/L  |
| 11  | RT21.424 | 21.424    | 3152    | Not calculated           | 0.000 | mg/L  |
| 12  | RT23.548 | 23.548    | 3012    | Not calculated           | 0.000 | mg/L  |
| 13  | RT26.067 | 26.067    | 88493   | Not calculated           | 0.000 | mg/L  |
| 14  | RT29.915 | 29.915    | 3447    | Not calculated           | 0.000 | mg/L  |
| 15  | RT30.598 | 30.598    | 1344    | Not calculated           | 0.000 | mg/L  |
| 16  | RT31.421 | 31.421    | 31786   | Not calculated           | 0.000 | mg/L  |
| 17  | RT34.934 | 34.934    | 159021  | Not calculated           | 0.000 | mg/L  |
| 18  | RT35.262 | 35.262    | 5286    | Not calculated           | 0.000 | mg/L  |
