# Supplementary material for: Simultaneous functioning of different light-harvesting complexes—a strategy of adaptation of purple bacterium Rhodopseudomonas palustris to low illumination conditions
Source: PeerJ journal article supplement (doi:10.7717/peerj.14769), 2023-01-31
Supplement: HPLC_2021-07-27_LH4_OP.pdf [file HPLC_2021-07-27_LH4_OP.pdf]

# ==== Shimadzu LcSolution Analysis Report ====

<3D Graph>

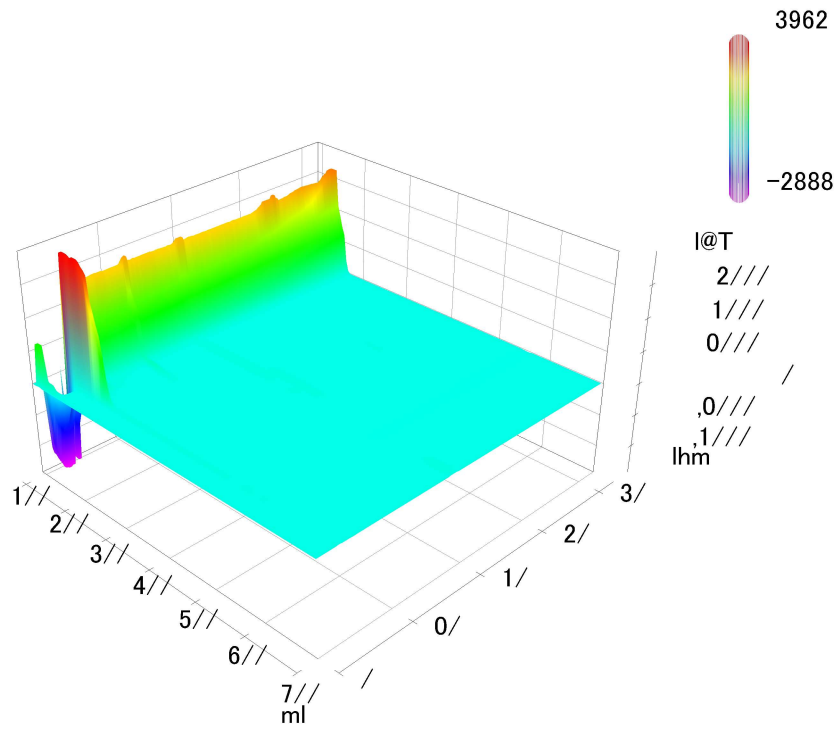

<Contour>

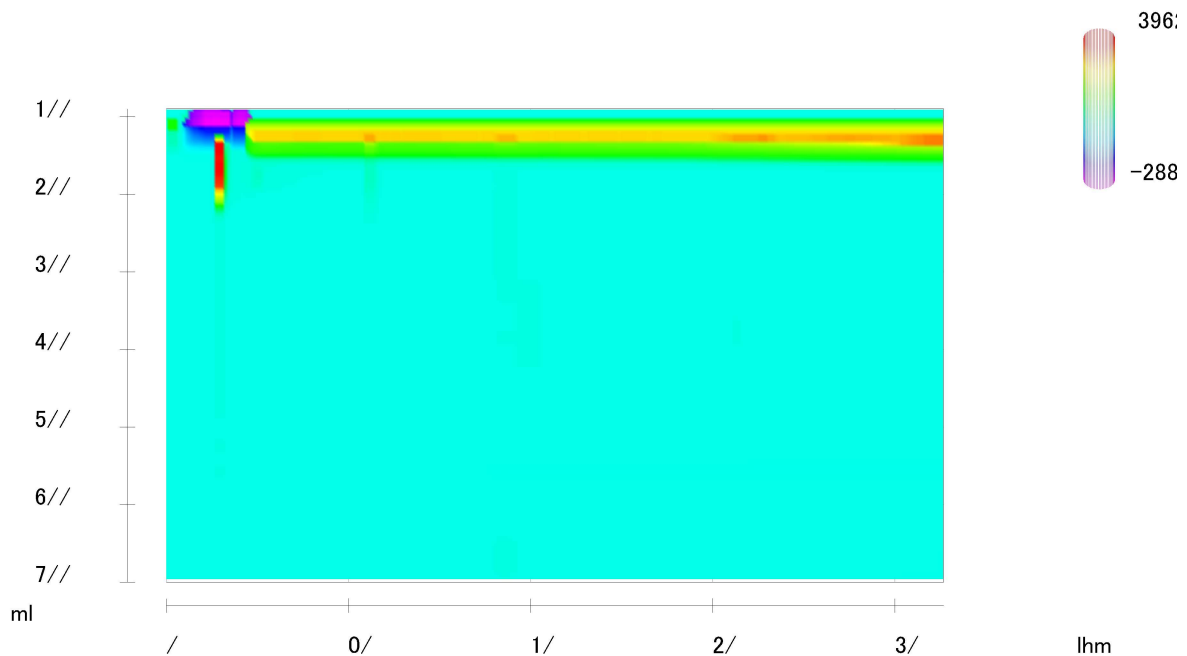

## ==== Shimadzu LCsolution Analysis Report ====

Sample Name : 2021-07-27 LH4 OP  
 Sample ID : 2021-07-27 LH4 OP  
 Operator : Admin  
 Data File Name : F:\Sascha BЭЖX\2021 BЭЖX\2021-07-27 LH4 OP.lcd  
 Method File Name : F:\Method\190-800.lcm  
 Batch File Name :  
 Report File Name : Default.lcr  
 Acquisition Date : 21/07/27 14:39:21  
 Modified Date : 22/05/23 0:15:02

### <Chromatogram>

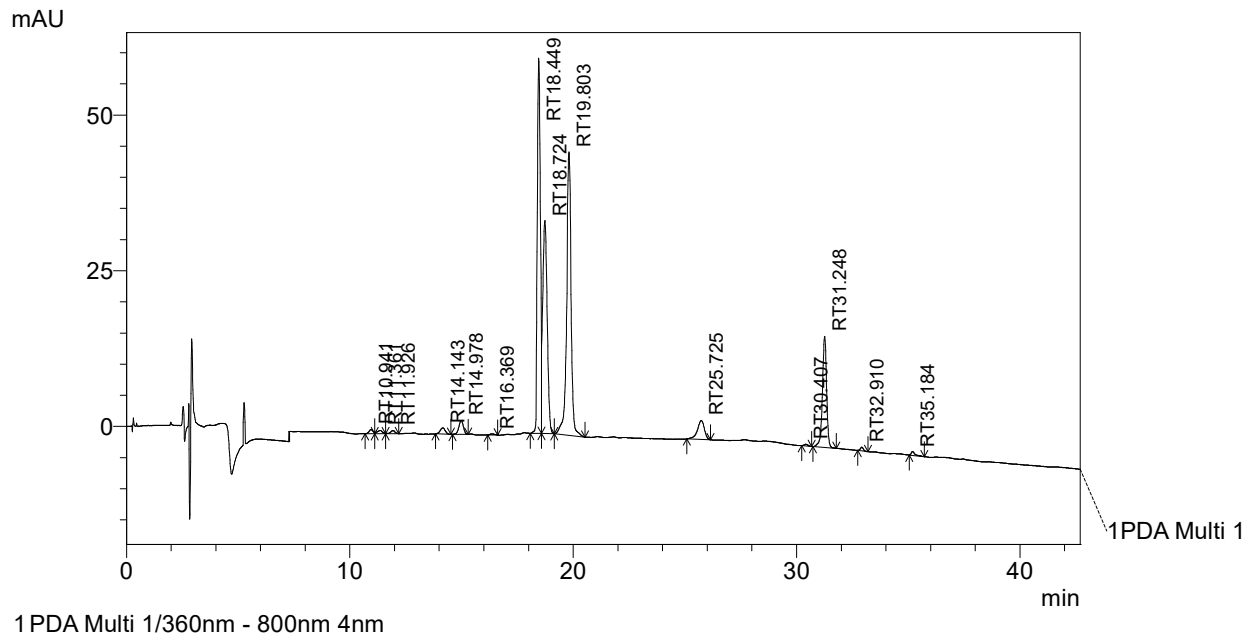

### <Results>

PDA

| ID# | Name     | Ret. Time | Area   | Minimum Peak Purity Inde | Conc. | Units |
|-----|----------|-----------|--------|--------------------------|-------|-------|
| 1   | RT10.941 | 10.941    | 8597   | Not calculated           | 0.000 | mg/L  |
| 2   | RT11.361 | 11.361    | 8747   | Not calculated           | 0.000 | mg/L  |
| 3   | RT11.926 | 11.926    | 6688   | Not calculated           | 0.000 | mg/L  |
| 4   | RT14.143 | 14.143    | 15874  | Not calculated           | 0.000 | mg/L  |
| 5   | RT14.978 | 14.978    | 31440  | Not calculated           | 0.000 | mg/L  |
| 6   | RT16.369 | 16.369    | 2372   | Not calculated           | 0.000 | mg/L  |
| 7   | RT18.449 | 18.449    | 588722 | Not calculated           | 0.000 | mg/L  |
| 8   | RT18.724 | 18.724    | 470230 | Not calculated           | 0.000 | mg/L  |
| 9   | RT19.803 | 19.803    | 629297 | Not calculated           | 0.000 | mg/L  |
| 10  | RT25.725 | 25.725    | 66035  | Not calculated           | 0.000 | mg/L  |
| 11  | RT30.407 | 30.407    | 3181   | Not calculated           | 0.000 | mg/L  |
| 12  | RT31.248 | 31.248    | 233829 | Not calculated           | 0.000 | mg/L  |
| 13  | RT32.910 | 32.911    | 5610   | Not calculated           | 0.000 | mg/L  |
| 14  | RT35.184 | 35.184    | 6925   | Not calculated           | 0.000 | mg/L  |
