# Supplementary material for: Simultaneous functioning of different light-harvesting complexes—a strategy of adaptation of purple bacterium Rhodopseudomonas palustris to low illumination conditions
Source: PeerJ. 2023 Jan 31;11:e14769. doi: 10.7717/peerj.14769 (PMC9897067; doi:10.7717/peerj.14769)
Supplement: Supplemental Information 1 — The peptides of light-harvesting complex are highlighted in green [file peerj-11-14769-s001.xlsx]

## Sheet: proteinGroups
Protein IDs	Majority protein IDs	Peptide counts (all)	Peptide counts (razor+unique)	Peptide counts (unique)	Fasta headers	Number of proteins	Peptides	Razor + unique peptides	Unique peptides	Peptides o	Peptides o_201006151521	Razor + unique peptides o	Razor + unique peptides o_201006151521	Unique peptides o	Unique peptides o_201006151521	Sequence coverage [%]	Unique + razor sequence coverage [%]	Unique sequence coverage [%]	Mol. weight [kDa]	Sequence length	Sequence lengths	Q-value	Score	Sequence coverage o [%]	Sequence coverage o_201006151521 [%]	Intensity	Intensity o	Intensity o_201006151521	iBAQ	iBAQ o	iBAQ o_201006151521	LFQ intensity o	LFQ intensity o_201006151521	MS/MS count o	MS/MS count o_201006151521	MS/MS count	Only identified by site	Reverse	Potential contaminant	id	Peptide IDs	Peptide is razor	Mod. peptide IDs	Evidence IDs	MS/MS IDs	Best MS/MS	Oxidation (M) site IDs	PropionAmide site IDs	Oxidation (M) site positions
CON__P00761	CON__P00761	4	4	4		1	4	4	4	4	4	4	4	4	4	21.6	21.6	21.6	24.409	231	231	0	292.3	21.6	21.6	4148000000	1332800000	2815200000	377090000	121160000	255930000	2141200000	1629100000	66	48	114			+	0	16;17;20;24	True;True;True;True	16;17;18;21;25	39;40;41;42;43;44;45;46;47;48;55;56;57;58;59;60;61;62;63;64;65;66;67;72;73;74;75;76;77;78;79;80;81;82;83;84;85;86;87;88;89;90;91;92;93;94;95;96;97;98;99;100;101;102;103;104;105;106;107;108;109;110;111	109;110;111;112;113;114;115;116;117;118;119;120;121;122;123;124;125;126;127;128;129;130;144;145;146;147;148;149;150;151;152;153;154;155;156;157;158;159;160;161;162;163;164;165;166;167;168;169;170;171;172;173;174;175;183;184;185;186;187;188;189;190;191;192;193;194;195;196;197;198;199;200;201;202;203;204;205;206;207;208;209;210;211;212;213;214;215;216;217;218;219;220;221;222;223;224;225;226;227;228…	124;129;162;187	0		94
CON__P04264;CON__Q8BGZ7;CON__P50446;CON__Q922U2;CON__Q5XQN5	CON__P04264	5;1;1;1;1	5;1;1;1;1	5;1;1;1;1		5	5	5	5	5	3	5	3	5	3	7	7	7	66.017	644	644;551;553;580;601	0	80.175	7	3.6	72592000	34646000	37946000	2341700	1117600	1224100	32631000	24284000	13	9	22			+	1	18;36;39;40;42	True;True;True;True;True	19;37;40;41;43	49;50;51;52;143;150;151;152;153;154;156	131;132;133;134;135;136;137;138;139;140;333;334;347;348;349;350;351;352;353;354;355;357	132;333;349;353;357
CON__P05787;CON__H-INV:HIT000292931;CON__REFSEQ:XP_092267;CON__Q9H552	CON__P05787;CON__H-INV:HIT000292931	5;4;1;1	5;4;1;1	5;4;1;1	;	4	5	5	5	5	3	5	3	5	3	13.5	13.5	13.5	53.704	483	483;443;213;499	0	68.666	13.5	7	24182000	15349000	8832800	833850	529280	304580	12323000	10774000	6	3	9			+	2	1;19;22;23;37	True;True;True;True;True	1;20;23;24;38	3;53;54;69;70;71;144;145	6;141;142;143;180;181;182;335;336	6;143;180;182;335
CON__P13645;CON__P02535-1	CON__P13645;CON__P02535-1	2;1	2;1	2;1	;	2	2	2	2	2	1	2	1	2	1	4.6	4.6	4.6	59.51	593	593;570	0	21.95	4.6	3.2	15328000	9860000	5468300	589550	379230	210320	9860000	0	3	2	5			+	3	9;32	True;True	9;33	21;22;136	56;57;58;59;313	57;313
CON__P35527	CON__P35527	3	3	3		1	3	3	3	3	2	3	2	3	2	9.8	9.8	9.8	62.129	623	623	0	48.44	9.8	4.7	30624000	18218000	12406000	1177900	700710	477150	17122000	11979000	4	3	7			+	4	3;8;35	True;True;True	3;8;36	6;7;20;141;142	11;12;55;329;330;331;332	11;55;329
sp|P35106|LHB1_RHOPALight-harvestingproteinB-800-850betachainAOS=Rhodopseudomonaspalustris(strainATCCBAA-98/CGA009)OX=258594GN=pucBAPE=1SV=2	sp|P35106|LHB1_RHOPALight-harvestingproteinB-800-850betachainAOS=Rhodopseudomonaspalustris(strainATCCBAA-98/CGA009)OX=258594GN=pucBAPE=1SV=2	1	1	1	sp|P35106|LHB1_RHOPA Light-harvesting protein B-800-850 beta chain A OS=Rhodopseudomonas palustris (strain ATCC BAA-98 / CGA009) OX=258594 GN=pucBA PE=1 SV=2	1	1	1	1	1	1	1	1	1	1	31.9	31.9	31.9	5.281	47	47	0	37.063	31.9	31.9	59382000	33123000	26258000	19794000	11041000	8752800	33288000	22869000	5	5	10				5	38	True	39	146;147;148;149	337;338;339;340;341;342;343;344;345;346	341
sp|P35107|LHB2_RHOPALight-harvestingproteinB-800-850betachainBOS=Rhodopseudomonaspalustris(strainATCCBAA-98/CGA009)OX=258594GN=pucBEPE=1SV=2	sp|P35107|LHB2_RHOPALight-harvestingproteinB-800-850betachainBOS=Rhodopseudomonaspalustris(strainATCCBAA-98/CGA009)OX=258594GN=pucBEPE=1SV=2	1	1	1	sp|P35107|LHB2_RHOPA Light-harvesting protein B-800-850 beta chain B OS=Rhodopseudomonas palustris (strain ATCC BAA-98 / CGA009) OX=258594 GN=pucBE PE=1 SV=2	1	1	1	1	1	1	1	1	1	1	43.1	43.1	43.1	5.7315	51	51	0	10.824	43.1	43.1	26443000	19141000	7302200	6610900	4785300	1825600	19141000	0	4	2	6				6	0	True	0	0;1;2	0;1;2;3;4;5	1
tr|Q6N6F9|Q6N6F9_RHOPASPORdomain-containingproteinOS=Rhodopseudomonaspalustris(strainATCCBAA-98/CGA009)OX=258594GN=RPA2658PE=4SV=1	tr|Q6N6F9|Q6N6F9_RHOPASPORdomain-containingproteinOS=Rhodopseudomonaspalustris(strainATCCBAA-98/CGA009)OX=258594GN=RPA2658PE=4SV=1	1	1	1	tr|Q6N6F9|Q6N6F9_RHOPA SPOR domain-containing protein OS=Rhodopseudomonas palustris (strain ATCC BAA-98 / CGA009) OX=258594 GN=RPA2658 PE=4 SV=1	1	1	1	1	1	0	1	0	1	0	3.2	3.2	3.2	48.276	463	463	0	6.1313	3.2	0	1031100	1031100	0	39659	39659	0	1031100	0	0	0	0				7	41	True	42	155	356	356
tr|Q6N7E3|Q6N7E3_RHOPANi_hydr_CYTBdomain-containingproteinOS=Rhodopseudomonaspalustris(strainATCCBAA-98/CGA009)OX=258594GN=RPA2315PE=4SV=1	tr|Q6N7E3|Q6N7E3_RHOPANi_hydr_CYTBdomain-containingproteinOS=Rhodopseudomonaspalustris(strainATCCBAA-98/CGA009)OX=258594GN=RPA2315PE=4SV=1	1	1	1	tr|Q6N7E3|Q6N7E3_RHOPA Ni_hydr_CYTB domain-containing protein OS=Rhodopseudomonas palustris (strain ATCC BAA-98 / CGA009) OX=258594 GN=RPA2315 PE=4 SV=1	1	1	1	1	1	0	1	0	1	0	4	4	4	24.178	224	224	0	7.9557	4	0	11039000	11039000	0	919940	919940	0	11039000	0	4	0	4				8	21	True	22	68	176;177;178;179	179
tr|Q6N9L4|Q6N9L4_RHOPALHCdomain-containingproteinOS=Rhodopseudomonaspalustris(strainATCCBAA-98/CGA009)OX=258594GN=pufAPE=4SV=1	tr|Q6N9L4|Q6N9L4_RHOPALHCdomain-containingproteinOS=Rhodopseudomonaspalustris(strainATCCBAA-98/CGA009)OX=258594GN=pufAPE=4SV=1	1	1	1	tr|Q6N9L4|Q6N9L4_RHOPA LHC domain-containing protein OS=Rhodopseudomonas palustris (strain ATCC BAA-98 / CGA009) OX=258594 GN=pufA PE=4 SV=1	1	1	1	1	1	1	1	1	1	1	12.7	12.7	12.7	7.2417	63	63	0	12.353	12.7	12.7	10972000	5982300	4989800	2743000	1495600	1247400	0	4376900	2	2	4				9	2	True	2	4;5	7;8;9;10	7
tr|Q6N9P5|Q6N9P5_RHOPAUncharacterizedproteinOS=Rhodopseudomonaspalustris(strainATCCBAA-98/CGA009)OX=258594GN=RPA1495PE=4SV=1	tr|Q6N9P5|Q6N9P5_RHOPAUncharacterizedproteinOS=Rhodopseudomonaspalustris(strainATCCBAA-98/CGA009)OX=258594GN=RPA1495PE=4SV=1	18	18	18	tr|Q6N9P5|Q6N9P5_RHOPA Uncharacterized protein OS=Rhodopseudomonas palustris (strain ATCC BAA-98 / CGA009) OX=258594 GN=RPA1495 PE=4 SV=1	1	18	18	18	18	18	18	18	18	18	83.5	83.5	83.5	10.836	97	97	0	322.35	83.5	83.5	2750200000	1522800000	1227400000	458370000	253810000	204560000	1517500000	1082000000	87	80	167				10	4;5;6;7;10;11;12;13;14;15;25;26;27;28;29;30;31;34	True;True;True;True;True;True;True;True;True;True;True;True;True;True;True;True;True;True	4;5;6;7;10;11;12;13;14;15;26;27;28;29;30;31;32;35	8;9;10;11;12;13;14;15;16;17;18;19;23;24;25;26;27;28;29;30;31;32;33;34;35;36;37;38;112;113;114;115;116;117;118;119;120;121;122;123;124;125;126;127;128;129;130;131;132;133;134;135;139;140	13;14;15;16;17;18;19;20;21;22;23;24;25;26;27;28;29;30;31;32;33;34;35;36;37;38;39;40;41;42;43;44;45;46;47;48;49;50;51;52;53;54;60;61;62;63;64;65;66;67;68;69;70;71;72;73;74;75;76;77;78;79;80;81;82;83;84;85;86;87;88;89;90;91;92;93;94;95;96;97;98;99;100;101;102;103;104;105;106;107;108;246;247;248;249;250;251;252;253;254;255;256;257;258;259;260;261;262;263;264;265;266;267;268;269;270;271;272;273;274;2…	13;27;30;44;61;72;80;85;92;100;249;255;268;276;281;298;305;327
tr|Q6N9P6|Q6N9P6_RHOPAUncharacterizedproteinOS=Rhodopseudomonaspalustris(strainATCCBAA-98/CGA009)OX=258594GN=RPA1494PE=4SV=1	tr|Q6N9P6|Q6N9P6_RHOPAUncharacterizedproteinOS=Rhodopseudomonaspalustris(strainATCCBAA-98/CGA009)OX=258594GN=RPA1494PE=4SV=1	1	1	1	tr|Q6N9P6|Q6N9P6_RHOPA Uncharacterized protein OS=Rhodopseudomonas palustris (strain ATCC BAA-98 / CGA009) OX=258594 GN=RPA1494 PE=4 SV=1	1	1	1	1	1	1	1	1	1	1	7.4	7.4	7.4	22.587	216	216	0	20.658	7.4	7.4	32679000	17454000	15225000	2723300	1454500	1268800	0	13355000	3	3	6				11	33	True	34	137;138	314;315;316;317;318;319	318
[truncated: 1 more columns]
