# Supplementary material for: Simultaneous functioning of different light-harvesting complexes—a strategy of adaptation of purple bacterium Rhodopseudomonas palustris to low illumination conditions
Source: PeerJ. 2023 Jan 31;11:e14769. doi: 10.7717/peerj.14769 (PMC9897067; doi:10.7717/peerj.14769)
Supplement: Supplemental Information 2 — The proteins of interest are highlighted in dark green. [file peerj-11-14769-s002.xlsx]

## Sheet: proteinGroups
Protein IDs	Majority protein IDs	Peptide counts (all)	Peptide counts (razor+unique)	Peptide counts (unique)	Fasta headers	Number of proteins	Peptides	Razor + unique peptides	Unique peptides	Peptides 1	Peptides 1_20210528054902	Razor + unique peptides 1	Razor + unique peptides 1_20210528054902	Unique peptides 1	Unique peptides 1_20210528054902	Sequence coverage [%]	Unique + razor sequence coverage [%]	Unique sequence coverage [%]	Mol. weight [kDa]	Sequence length	Sequence lengths	Q-value	Score	Sequence coverage 1 [%]	Sequence coverage 1_20210528054902 [%]	Intensity	Intensity 1	Intensity 1_20210528054902	iBAQ	iBAQ 1	iBAQ 1_20210528054902	LFQ intensity 1	LFQ intensity 1_20210528054902	MS/MS count 1	MS/MS count 1_20210528054902	MS/MS count	Only identified by site	Reverse	Potential contaminant	id	Peptide IDs	Peptide is razor	Mod. peptide IDs	Evidence IDs	MS/MS IDs	Best MS/MS	Oxidation (M) site IDs	Oxidation (M) site positions
CON__P35908v2;CON__P35908;CON__Q9R0H5	CON__P35908v2;CON__P35908	31;30;2	31;30;2	18;17;0	;	3	31	31	18	30	29	30	29	17	16	51.2	51.2	35.5	65.432	639	639;645;524	0	323.31	49.8	47.3	8503300000	4385000000	4118200000	212580000	109630000	102960000	4171800000	3924000000	53	51	104			+	12	2;37;73;100;119;141;142;148;175;190;221;229;235;236;241;263;266;271;312;324;329;353;378;397;403;450;451;465;488;493;497	True;True;True;True;True;True;True;True;True;True;True;True;True;True;True;True;True;True;True;True;True;True;True;True;True;True;True;True;True;True;True	2;40;79;80;110;131;154;155;161;190;207;243;244;252;258;259;264;286;289;294;349;363;369;394;423;443;449;499;500;514;541;546;551	4;141;142;234;235;236;237;306;307;353;354;433;434;435;436;446;447;607;608;609;610;663;664;665;754;755;756;757;758;774;775;816;817;818;819;820;821;822;823;839;840;841;880;881;887;888;895;896;897;898;1121;1122;1169;1170;1171;1172;1188;1189;1251;1252;1323;1324;1325;1326;1327;1328;1375;1376;1389;1390;1794;1795;1796;1797;1820;1821;2030;2031;2032;2033;2034;2035;2043;2044;2052	4;302;303;304;305;306;429;430;431;432;540;541;594;595;748;749;750;751;752;753;754;765;766;1041;1042;1043;1044;1045;1046;1047;1048;1123;1124;1125;1126;1236;1237;1238;1239;1240;1260;1261;1329;1330;1331;1332;1333;1334;1335;1336;1355;1356;1357;1358;1359;1360;1421;1422;1423;1434;1435;1436;1437;1446;1447;1448;1449;1824;1825;1826;1893;1894;1895;1896;1897;1922;1923;1924;2002;2003;2103;2104;2105;2106;2107…	4;303;431;540;594;751;754;766;1042;1126;1238;1260;1329;1332;1359;1423;1436;1446;1825;1895;1922;2003;2108;2196;2216;3104;3108;3150;3563;3578;3590	20	294
CON__P04264;CON__H-INV:HIT000016045	CON__P04264	29;3	26;2	17;0		2	29	26	17	28	27	25	24	16	16	43.9	40.8	31.2	66.017	644	644;99	0	323.31	42.5	42.1	10619000000	4822100000	5797300000	342560000	155550000	187010000	4873000000	4253500000	91	93	184			+	6	17;72;78;119;124;143;164;190;220;240;265;273;309;310;315;335;358;359;376;377;384;386;388;420;425;428;481;488;490	True;True;True;False;True;True;True;False;True;True;True;True;True;True;True;True;True;True;True;True;True;True;True;True;True;True;True;False;True	20;77;78;86;87;131;136;156;178;207;241;242;263;288;296;346;347;352;353;354;375;403;404;421;422;429;431;433;466;471;474;532;541;543	103;104;226;227;228;229;230;231;232;233;250;251;252;253;254;255;256;353;354;367;368;369;437;438;540;541;663;664;665;748;749;750;751;752;753;831;832;833;834;835;836;837;838;885;886;900;901;902;903;904;905;1109;1110;1111;1112;1113;1114;1115;1116;1127;1128;1129;1130;1131;1132;1133;1134;1135;1136;1137;1138;1139;1140;1141;1142;1143;1144;1145;1146;1147;1148;1198;1199;1200;1270;1271;1272;1273;1317;1318;…	252;253;254;255;419;420;421;422;423;424;425;426;427;428;452;453;454;455;456;457;458;459;460;461;462;463;594;595;612;613;614;755;756;887;888;1123;1124;1125;1126;1229;1230;1231;1232;1233;1234;1235;1344;1345;1346;1347;1348;1349;1350;1351;1352;1353;1354;1427;1428;1429;1430;1431;1432;1433;1451;1452;1453;1454;1455;1456;1457;1802;1803;1804;1805;1806;1807;1808;1809;1810;1811;1812;1813;1814;1815;1816;1817…	255;420;461;594;613;756;887;1126;1234;1352;1430;1456;1804;1806;1859;1939;2025;2027;2093;2102;2126;2136;2147;2263;2290;2836;3526;3563;3570	5;6;7;8	259;262;296;469
CON__P13645;CON__P02535-1;CON__Q7Z3Y7;CON__Q148H6;CON__P05784;CON__Q7Z3Z0;CON__Q7Z3Y8;CON__Q2M2I5;CON__Q14525;CON__Q9UE12;CON__Q15323;CON__A2A5Y0;CON__Q92764;CON__Q14532;CON__A2AB72;CON__Q497I4;CON__O76015;CON__O76013;CON__Q7Z3Y9;CON__O76014;CON__REFSEQ:XP_986630	CON__P13645	29;9;4;3;2;2;2;2;1;1;1;1;1;1;1;1;1;1;1;1;1	29;9;4;3;2;2;2;2;1;1;1;1;1;1;1;1;1;1;1;1;1	25;6;2;1;0;1;1;0;0;0;0;0;0;0;0;0;0;0;0;0;0		21	29	29	25	27	28	27	28	23	24	46	46	40.3	59.51	593	593;570;486;464;423;450;459;525;404;416;416;416;425;448;453;455;456;467;468;471;476	0	323.31	42.3	45.9	7811000000	3229500000	4581500000	300420000	124210000	176210000	3489600000	3573500000	59	73	132			+	8	29;48;91;166;197;208;219;230;239;242;246;261;305;319;323;325;340;342;352;361;362;370;379;385;392;393;462;474;494	True;True;True;True;True;True;True;True;True;True;True;True;True;True;True;True;True;True;True;True;True;True;True;True;True;True;True;True;True	32;53;101;180;215;227;240;253;262;265;269;284;340;341;358;362;364;365;380;382;393;406;407;415;424;430;437;438;511;524;525;547	123;124;171;172;173;174;283;284;285;286;544;545;687;688;719;720;721;722;746;747;776;828;829;830;842;843;844;851;852;875;876;877;878;1096;1097;1098;1099;1100;1154;1155;1156;1157;1163;1164;1165;1166;1167;1168;1173;1174;1175;1176;1209;1210;1213;1214;1247;1248;1249;1250;1275;1276;1277;1278;1279;1304;1329;1342;1343;1357;1358;1359;1360;1361;1362;1363;1364;1814;1815;1816;1844;1845;1846;1847;1848;2045;20…	276;277;278;279;280;281;345;346;347;348;349;350;351;352;353;503;504;505;506;507;508;891;892;893;1161;1162;1197;1198;1199;1200;1227;1228;1262;1341;1342;1343;1361;1362;1363;1370;1371;1372;1373;1374;1416;1417;1418;1419;1786;1787;1788;1789;1790;1868;1869;1870;1871;1872;1873;1884;1885;1886;1887;1888;1889;1890;1891;1892;1898;1899;1900;1901;1902;1903;1904;1905;1952;1953;1956;1957;1998;1999;2000;2001;203…	277;345;508;893;1162;1198;1227;1262;1341;1363;1371;1418;1786;1869;1889;1905;1952;1956;2000;2030;2034;2074;2110;2131;2173;2180;3143;3190;3583	4;9;10	150;291;306
CON__P35527;CON__Q99456	CON__P35527	24;1	23;0	23;0		2	24	23	23	22	23	21	22	21	22	48.2	47	47	62.129	623	623;494	0	323.31	44.3	46.7	5364300000	2762100000	2602100000	206320000	106240000	100080000	2101800000	1908100000	64	64	128			+	11	57;106;125;144;146;147;157;177;198;206;225;242;298;328;331;332;334;343;355;356;371;396;424;470	True;True;True;True;True;True;True;True;True;True;True;False;True;True;True;True;True;True;True;True;True;True;True;True	62;116;117;137;157;159;160;170;192;216;217;225;248;265;327;328;368;371;372;374;383;384;396;397;398;399;400;401;416;441;442;470;520	197;198;199;200;321;322;323;324;325;326;327;370;371;372;439;440;443;444;445;520;521;613;614;615;689;690;691;692;693;694;695;696;697;698;699;700;701;716;764;765;842;843;844;987;988;989;990;991;992;1183;1184;1185;1186;1187;1191;1192;1193;1196;1197;1215;1216;1217;1218;1254;1255;1256;1257;1258;1259;1260;1261;1262;1263;1264;1265;1266;1267;1305;1306;1369;1370;1371;1372;1373;1374;1436;1437;1835;1836;183…	378;379;380;381;382;556;557;558;559;560;561;562;563;564;615;616;617;618;619;757;758;759;762;763;764;867;868;1052;1053;1054;1055;1056;1057;1058;1059;1163;1164;1165;1166;1167;1168;1169;1170;1171;1172;1173;1174;1175;1176;1192;1248;1249;1361;1362;1363;1578;1579;1580;1581;1582;1583;1584;1585;1586;1587;1588;1589;1590;1591;1592;1593;1912;1913;1914;1915;1916;1917;1918;1919;1920;1921;1926;1927;1928;1929;1…	380;564;618;759;763;764;868;1059;1173;1192;1249;1363;1578;1919;1926;1928;1934;1960;2008;2021;2079;2187;2282;3176	14;15;16;17;18;19	157;234;245;269;276;286
CON__P13647;CON__Q8VED5;CON__Q5XKE5	CON__P13647	21;6;5	13;1;1	2;0;0		3	21	13	2	20	17	12	9	1	2	30.2	21.9	3.4	62.378	590	590;531;535	0	122.41	28.3	24.4	340830000	189280000	151550000	10994000	6105800	4888600	156400000	152590000	20	16	36			+	9	36;71;100;118;173;210;229;241;263;309;310;312;336;339;409;435;438;446;486;488;491	True;True;False;True;True;True;False;False;False;False;False;False;True;True;True;True;True;True;True;False;True	39;76;110;130;187;188;229;252;264;286;346;347;349;376;379;455;481;484;493;494;538;541;544	139;140;225;306;307;352;599;600;601;602;726;774;775;839;840;841;880;881;1109;1110;1111;1112;1113;1114;1115;1116;1121;1122;1201;1202;1205;1206;1207;1208;1403;1682;1686;1687;1717;1718;1719;2025;2026;2030;2031;2032;2033;2034;2035;2039;2040	300;301;418;540;541;593;1027;1028;1029;1030;1205;1260;1261;1355;1356;1357;1358;1359;1360;1421;1422;1423;1802;1803;1804;1805;1806;1807;1808;1809;1810;1811;1812;1813;1814;1815;1816;1817;1824;1825;1826;1941;1942;1943;1946;1947;1948;1949;1950;1951;2230;2853;2858;2859;2860;2861;2862;2907;2908;2909;3550;3551;3552;3553;3554;3555;3556;3557;3558;3563;3564;3565;3566;3567;3568;3574;3575	301;418;540;593;1027;1205;1260;1359;1423;1804;1806;1825;1943;1948;2230;2853;2859;2908;3558;3563;3575	11;12;13	297;303;389
CON__P48668;CON__P04259;CON__P02538;CON__O95678;CON__P05787;CON__H-INV:HIT000292931	CON__P48668;CON__P04259;CON__P02538	20;20;19;9;6;3	6;6;5;1;1;1	2;2;1;0;0;0	;;	6	20	6	2	20	16	6	4	2	2	29.8	10.6	3.9	60.024	564	564;564;564;551;483;443	0	166.27	29.8	23.9	85937000	11903000	74034000	2864600	396780	2467800	0	68159000	6	5	11			+	5	14;37;71;98;100;118;229;241;263;309;310;312;330;336;339;369;404;486;488;492	True;False;False;True;False;False;False;False;False;False;False;False;True;False;False;True;True;False;False;True	17;40;76;108;110;130;252;264;286;346;347;349;370;376;379;414;450;538;541;545	94;95;141;142;225;304;306;307;352;774;775;839;840;841;880;881;1109;1110;1111;1112;1113;1114;1115;1116;1121;1122;1190;1201;1202;1205;1206;1207;1208;1302;1303;1391;1392;2025;2026;2030;2031;2032;2033;2034;2035;2041;2042	227;228;229;302;303;304;305;306;418;538;540;541;593;1260;1261;1355;1356;1357;1358;1359;1360;1421;1422;1423;1802;1803;1804;1805;1806;1807;1808;1809;1810;1811;1812;1813;1814;1815;1816;1817;1824;1825;1826;1925;1941;1942;1943;1946;1947;1948;1949;1950;1951;2072;2073;2217;2218;3550;3551;3552;3553;3554;3555;3556;3557;3558;3563;3564;3565;3566;3567;3568;3576;3577	227;303;418;538;540;593;1260;1359;1423;1804;1806;1825;1925;1943;1948;2073;2217;3558;3563;3577
CON__P02533;CON__Q9QWL7;CON__Q6IFX2;CON__P19012;CON__A2A4G1;CON__P08727;CON__Q9Z2K1;CON__Q3ZAW8;CON__Q61782;CON__Q9D312;CON__Q8N1A0	CON__P02533;CON__Q9QWL7	17;9;8;6;6;5;5;5;2;2;1	14;7;7;4;3;3;3;3;2;2;1	5;1;2;0;0;1;0;0;0;0;0	;	11	17	14	5	16	16	13	13	5	5	38.8	33.9	15.3	51.621	472	472;433;452;456;456;400;469;474;93;431;295	0	140.43	37.3	36.4	324520000	157460000	167060000	11190000	5429700	5760700	138400000	161410000	22	18	40			+	2	13;28;33;39;49;96;163;202;239;242;249;297;306;360;434;461;474	True;True;True;True;True;True;True;True;False;False;True;True;True;True;True;True;False	15;16;31;36;42;54;106;177;221;262;265;272;325;326;342;343;405;480;510;524;525	90;91;92;93;121;122;131;132;147;175;176;299;300;538;539;708;709;828;829;830;842;843;844;855;856;984;985;986;1101;1102;1274;1679;1680;1681;1812;1813;1844;1845;1846;1847;1848	223;224;225;226;274;275;290;291;312;354;355;527;528;529;530;531;885;886;1183;1184;1341;1342;1343;1361;1362;1363;1377;1378;1379;1380;1381;1574;1575;1576;1577;1791;1792;1793;2029;2849;2850;2851;2852;3126;3127;3128;3129;3185;3186;3187;3188;3189;3190;3191;3192;3193;3194;3195;3196	223;275;290;312;355;530;885;1183;1341;1363;1380;1575;1793;2029;2850;3129;3190	1;2;3;4	119;212;237;257
tr|Q6N0W6|Q6N0W6_RHOPAPhosphoribulokinaseOS=Rhodopseudomonaspalustris(strainATCCBAA-98/CGA009)OX=258594GN=cbbPPE=3SV=1	tr|Q6N0W6|Q6N0W6_RHOPAPhosphoribulokinaseOS=Rhodopseudomonaspalustris(strainATCCBAA-98/CGA009)OX=258594GN=cbbPPE=3SV=1	16	16	16	tr|Q6N0W6|Q6N0W6_RHOPA Phosphoribulokinase OS=Rhodopseudomonas palustris (strain ATCC BAA-98 / CGA009) OX=258594 GN=cbbP PE=3 SV=1	1	16	16	16	16	16	16	16	16	16	56.4	56.4	56.4	33.244	291	291	0	323.31	56.4	56.4	5114800000	2360100000	2754700000	340980000	157340000	183650000	2423300000	2361400000	57	45	102				46	92;170;174;179;194;226;233;290;295;347;351;401;410;466;469;485	True;True;True;True;True;True;True;True;True;True;True;True;True;True;True;True	102;184;189;196;211;249;256;316;317;323;388;392;447;456;515;519;536;537	287;288;289;290;591;592;593;594;603;604;605;606;627;628;673;674;766;767;768;769;781;782;783;784;964;965;966;978;979;980;981;1223;1224;1225;1226;1227;1228;1229;1230;1231;1232;1233;1234;1235;1236;1237;1245;1246;1383;1384;1385;1404;1405;1822;1823;1824;1833;1834;2019;2020;2021;2022;2023;2024	509;510;511;512;513;1014;1015;1016;1017;1018;1019;1020;1031;1032;1033;1034;1035;1036;1037;1038;1039;1040;1071;1072;1138;1139;1140;1141;1142;1250;1251;1252;1253;1254;1255;1267;1268;1269;1270;1271;1548;1549;1550;1566;1567;1568;1569;1570;1571;1967;1968;1969;1970;1971;1972;1973;1974;1975;1976;1977;1978;1979;1980;1981;1982;1983;1984;1985;1993;1994;1995;1996;1997;2206;2207;2208;2231;2232;2233;2234;2235…	511;1015;1035;1071;1141;1252;1268;1550;1570;1972;1997;2206;2238;3154;3170;3545	29;30	56;230
tr|Q6N5R4|Q6N5R4_RHOPACitratesynthaseOS=Rhodopseudomonaspalustris(strainATCCBAA-98/CGA009)OX=258594GN=cisYPE=3SV=1	tr|Q6N5R4|Q6N5R4_RHOPACitratesynthaseOS=Rhodopseudomonaspalustris(strainATCCBAA-98/CGA009)OX=258594GN=cisYPE=3SV=1	14	14	14	tr|Q6N5R4|Q6N5R4_RHOPA Citrate synthase OS=Rhodopseudomonas palustris (strain ATCC BAA-98 / CGA009) OX=258594 GN=cisY PE=3 SV=1	1	14	14	14	13	12	13	12	13	12	44.5	44.5	44.5	48.026	434	434	0	306.61	41.2	35.3	5601600000	2803500000	2798100000	243550000	121890000	121660000	2747400000	2486100000	30	36	66				76	50;89;178;185;192;287;303;320;337;407;440;444;468;501	True;True;True;True;True;True;True;True;True;True;True;True;True;True	55;99;193;194;195;202;209;311;338;359;377;453;486;490;491;517;518;555	177;278;279;280;616;617;618;619;620;621;622;623;624;625;626;654;655;667;668;669;670;947;948;949;1090;1091;1092;1093;1158;1159;1203;1397;1398;1399;1400;1689;1690;1691;1702;1703;1704;1705;1706;1827;1828;1829;1830;1831;1832;2059;2060	356;498;499;500;1060;1061;1062;1063;1064;1065;1066;1067;1068;1069;1070;1105;1106;1107;1108;1128;1129;1130;1131;1132;1527;1528;1529;1776;1777;1778;1779;1780;1781;1782;1783;1874;1875;1876;1877;1878;1879;1944;2223;2224;2225;2226;2864;2865;2866;2867;2868;2869;2882;2883;2884;2885;2886;3159;3160;3161;3162;3163;3164;3165;3166;3167;3168;3599;3600;3601	356;500;1067;1105;1132;1527;1777;1876;1944;2224;2865;2884;3162;3601	40;41;42;43	117;122;179;346
CON__P08779	CON__P08779	12	3	3		1	12	3	3	11	11	2	3	2	3	23.5	6.3	6.3	51.267	473	473	0	30.928	21.4	21.1	28369000	9429600	18939000	978240	325160	653080	13793000	13073000	2	1	3			+	7	28;39;95;163;239;242;249;363;422;434;461;474	False;False;True;False;False;False;False;True;True;False;False;False	31;42;105;177;262;265;272;408;468;480;510;524;525	121;122;147;297;298;538;539;828;829;830;842;843;844;855;856;1280;1281;1434;1679;1680;1681;1812;1813;1844;1845;1846;1847;1848	274;275;312;525;526;885;886;1341;1342;1343;1361;1362;1363;1377;1378;1379;1380;1381;2035;2036;2279;2849;2850;2851;2852;3126;3127;3128;3129;3185;3186;3187;3188;3189;3190;3191;3192;3193;3194;3195;3196	275;312;526;885;1341;1363;1380;2036;2279;2850;3129;3190	4	121
tr|Q6N4D0|Q6N4D0_RHOPAAmidohydro_3domain-containingproteinOS=Rhodopseudomonaspalustris(strainATCCBAA-98/CGA009)OX=258594GN=RPA3409PE=4SV=1	tr|Q6N4D0|Q6N4D0_RHOPAAmidohydro_3domain-containingproteinOS=Rhodopseudomonaspalustris(strainATCCBAA-98/CGA009)OX=258594GN=RPA3409PE=4SV=1	12	12	12	tr|Q6N4D0|Q6N4D0_RHOPA Amidohydro_3 domain-containing protein OS=Rhodopseudomonas palustris (strain ATCC BAA-98 / CGA009) OX=258594 GN=RPA3409 PE=4 SV=1	1	12	12	12	11	11	11	11	11	11	26	26	26	67.451	624	624	0	133.55	24.8	24.2	340180000	164170000	176000000	10631000	5130500	5500100	182960000	136490000	15	15	30				69	4;6;76;130;172;186;213;250;264;455;458;499	True;True;True;True;True;True;True;True;True;True;True;True	4;6;84;143;186;203;232;273;287;504;507;553	8;9;11;12;244;245;386;387;597;598;656;657;731;857;858;882;883;884;1803;1804;1805;1808;2055;2056	8;9;11;12;444;445;446;447;636;637;638;1023;1024;1025;1026;1109;1110;1111;1210;1382;1383;1424;1425;1426;3116;3117;3118;3119;3122;3593;3594;3595	8;12;445;636;1025;1110;1210;1382;1424;3119;3122;3595
tr|Q6N915|Q6N915_RHOPABeta-glucosidaseOS=Rhodopseudomonaspalustris(strainATCCBAA-98/CGA009)OX=258594GN=bglAPE=3SV=1	tr|Q6N915|Q6N915_RHOPABeta-glucosidaseOS=Rhodopseudomonaspalustris(strainATCCBAA-98/CGA009)OX=258594GN=bglAPE=3SV=1	12	12	12	tr|Q6N915|Q6N915_RHOPA Beta-glucosidase OS=Rhodopseudomonas palustris (strain ATCC BAA-98 / CGA009) OX=258594 GN=bglA PE=3 SV=1	1	12	12	12	11	11	11	11	11	11	29.3	29.3	29.3	51.738	458	458	0	152.08	27.5	27.5	1956300000	1105600000	850720000	69869000	39486000	30383000	912180000	940170000	17	15	32				95	22;51;69;77;101;114;122;137;259;390;482;484	True;True;True;True;True;True;True;True;True;True;True;True	25;56;74;85;111;126;134;150;282;435;533;535	111;178;179;221;222;246;247;248;249;308;309;310;311;312;313;344;345;363;364;397;871;872;873;1353;1354;2013;2014;2017;2018	262;357;358;411;412;448;449;450;451;542;543;544;545;546;547;585;586;607;608;609;653;1411;1412;1413;1414;2163;2164;2165;2166;3529;3530;3536;3537	262;358;412;451;544;585;609;653;1412;2166;3529;3537
tr|Q6N7Q6|Q6N7Q6_RHOPAInosine-5'-monophosphatedehydrogenaseOS=Rhodopseudomonaspalustris(strainATCCBAA-98/CGA009)OX=258594GN=guaBPE=3SV=1	tr|Q6N7Q6|Q6N7Q6_RHOPAInosine-5'-monophosphatedehydrogenaseOS=Rhodopseudomonaspalustris(strainATCCBAA-98/CGA009)OX=258594GN=guaBPE=3SV=1	11	11	11	tr|Q6N7Q6|Q6N7Q6_RHOPA Inosine-5-monophosphate dehydrogenase OS=Rhodopseudomonas palustris (strain ATCC BAA-98 / CGA009) OX=258594 GN=guaB PE=3 SV=1	1	11	11	11	8	10	8	10	8	10	30.7	30.7	30.7	52.394	498	498	0	114.61	22.3	27.5	129100000	58074000	71031000	4034500	1814800	2219700	55801000	67666000	7	9	16				88	7;24;54;211;218;256;292;304;442;454;460	True;True;True;True;True;True;True;True;True;True;True	7;27;59;230;239;279;320;339;488;503;509	13;114;115;190;191;192;727;728;745;867;974;1094;1095;1696;1697;1801;1802;1810;1811	13;265;266;369;370;371;1206;1207;1226;1407;1560;1784;1785;2874;2875;2876;3114;3115;3124;3125	13;266;370;1207;1226;1407;1560;1785;2876;3115;3124
CON__Q04695	CON__Q04695	9	1	0		1	9	1	0	7	9	0	1	0	0	17.4	2.5	0	48.105	432	432	0	7.8164	13.2	17.4	6472200	0	6472200	223180	0	223180	0	5958600	0	0	0			+	13	96;239;242;249;278;306;360;434;461	False;False;False;False;True;False;False;False;False	106;262;265;272;301;342;343;405;480;510	299;300;828;829;830;842;843;844;855;856;922;1101;1102;1274;1679;1680;1681;1812;1813	527;528;529;530;531;1341;1342;1343;1361;1362;1363;1377;1378;1379;1380;1381;1497;1791;1792;1793;2029;2849;2850;2851;2852;3126;3127;3128;3129	530;1341;1363;1380;1497;1793;2029;2850;3129	3	226
sp|Q9ZNH4|PCKA_RHOPAPhosphoenolpyruvatecarboxykinase(ATP)OS=Rhodopseudomonaspalustris(strainATCCBAA-98/CGA009)OX=258594GN=pckAPE=1SV=2	sp|Q9ZNH4|PCKA_RHOPAPhosphoenolpyruvatecarboxykinase(ATP)OS=Rhodopseudomonaspalustris(strainATCCBAA-98/CGA009)OX=258594GN=pckAPE=1SV=2	9	9	9	sp|Q9ZNH4|PCKA_RHOPA Phosphoenolpyruvate carboxykinase (ATP) OS=Rhodopseudomonas palustris (strain ATCC BAA-98 / CGA009) OX=258594 GN=pckA PE=1 SV=2	1	9	9	9	7	8	7	8	7	8	28.5	28.5	28.5	58.771	537	537	0	83.943	23.1	25	80962000	35185000	45777000	2791800	1213300	1578500	37586000	37736000	8	11	19				41	20;31;112;167;171;326;398;408;479	True;True;True;True;True;True;True;True;True	23;34;124;181;185;366;444;454;530	108;127;128;340;341;546;595;596;1177;1178;1179;1180;1377;1378;1401;1402;2008;2009	259;284;285;286;287;581;582;894;1021;1022;1906;1907;1908;1909;2198;2199;2227;2228;2229;3521;3522	259;285;582;894;1022;1907;2199;2227;3522
tr|Q6ND06|Q6ND06_RHOPATim44domain-containingproteinOS=Rhodopseudomonaspalustris(strainATCCBAA-98/CGA009)OX=258594GN=RPA0303PE=3SV=1	tr|Q6ND06|Q6ND06_RHOPATim44domain-containingproteinOS=Rhodopseudomonaspalustris(strainATCCBAA-98/CGA009)OX=258594GN=RPA0303PE=3SV=1	9	9	9	tr|Q6ND06|Q6ND06_RHOPA Tim44 domain-containing protein OS=Rhodopseudomonas palustris (strain ATCC BAA-98 / CGA009) OX=258594 GN=RPA0303 PE=3 SV=1	1	9	9	9	9	8	9	8	9	8	24.2	24.2	24.2	31.577	289	289	0	123.31	24.2	24.2	1413800000	737160000	676680000	108760000	56705000	52052000	700650000	621460000	14	15	29				118	21;60;61;62;127;284;414;415;476	True;True;True;True;True;True;True;True;True	24;65;66;67;139;140;308;460;461;527	109;110;205;206;207;208;209;210;211;212;375;376;377;378;942;943;1414;1415;1416;1417;1418;1850;1851	260;261;389;390;391;392;393;394;395;396;397;398;399;623;624;625;626;627;1522;1523;2249;2250;2251;2252;2253;2254;3198;3199;3200	260;391;395;397;625;1522;2250;2254;3199	50	241
tr|Q6N9N0|Q6N9N0_RHOPAABhydrolase-1domain-containingproteinOS=Rhodopseudomonaspalustris(strainATCCBAA-98/CGA009)OX=258594GN=RPA1510PE=4SV=1	tr|Q6N9N0|Q6N9N0_RHOPAABhydrolase-1domain-containingproteinOS=Rhodopseudomonaspalustris(strainATCCBAA-98/CGA009)OX=258594GN=RPA1510PE=4SV=1	8	8	8	tr|Q6N9N0|Q6N9N0_RHOPA AB hydrolase-1 domain-containing protein OS=Rhodopseudomonas palustris (strain ATCC BAA-98 / CGA009) OX=258594 GN=RPA1510 PE=4 SV=1	1	8	8	8	7	8	7	8	7	8	31.2	31.2	31.2	35.283	317	317	0	76.132	24.9	31.2	816990000	435800000	381200000	58357000	31128000	27228000	417240000	369500000	10	10	20				100	8;47;188;217;345;382;383;394	True;True;True;True;True;True;True;True	8;52;205;238;386;427;428;439	14;15;169;170;659;660;743;744;1220;1333;1334;1335;1336;1365;1366;1367	14;15;16;17;343;344;1113;1114;1115;1116;1117;1224;1225;1964;2116;2117;2118;2119;2181;2182;2183	17;343;1116;1224;1964;2117;2118;2182
tr|Q6N9P5|Q6N9P5_RHOPAUncharacterizedproteinOS=Rhodopseudomonaspalustris(strainATCCBAA-98/CGA009)OX=258594GN=RPA1495PE=4SV=1	tr|Q6N9P5|Q6N9P5_RHOPAUncharacterizedproteinOS=Rhodopseudomonaspalustris(strainATCCBAA-98/CGA009)OX=258594GN=RPA1495PE=4SV=1	8	8	8	tr|Q6N9P5|Q6N9P5_RHOPA Uncharacterized protein OS=Rhodopseudomonas palustris (strain ATCC BAA-98 / CGA009) OX=258594 GN=RPA1495 PE=4 SV=1	1	8	8	8	8	8	8	8	8	8	80.4	80.4	80.4	10.836	97	97	0	130.81	80.4	80.4	58452000000	29877000000	28575000000	9742000000	4979500000	4762500000	24684000000	23213000000	143	163	306				102	138;139;140;150;168;169;357;367	True;True;True;True;True;True;True;True	151;152;153;163;182;183;402;412	398;399;400;401;402;403;404;405;406;407;408;409;410;411;412;413;414;415;416;417;418;419;420;421;422;423;424;425;426;427;428;429;430;431;432;449;450;451;452;453;454;455;456;457;458;459;460;461;462;463;464;465;466;467;468;469;470;471;472;473;474;475;476;477;478;479;480;481;482;483;484;485;486;487;488;489;490;491;492;493;494;495;496;497;498;499;500;501;502;503;504;505;506;507;508;509;510;547;548;549…	654;655;656;657;658;659;660;661;662;663;664;665;666;667;668;669;670;671;672;673;674;675;676;677;678;679;680;681;682;683;684;685;686;687;688;689;690;691;692;693;694;695;696;697;698;699;700;701;702;703;704;705;706;707;708;709;710;711;712;713;714;715;716;717;718;719;720;721;722;723;724;725;726;727;728;729;730;731;732;733;734;735;736;737;738;739;740;741;742;743;744;745;746;747;768;769;770;771;772;773…	691;726;746;772;911;1012;2024;2070
tr|Q6N0W7|Q6N0W7_RHOPATransketolaseOS=Rhodopseudomonaspalustris(strainATCCBAA-98/CGA009)OX=258594GN=cbbT1PE=3SV=1	tr|Q6N0W7|Q6N0W7_RHOPATransketolaseOS=Rhodopseudomonaspalustris(strainATCCBAA-98/CGA009)OX=258594GN=cbbT1PE=3SV=1	7	7	7	tr|Q6N0W7|Q6N0W7_RHOPA Transketolase OS=Rhodopseudomonas palustris (strain ATCC BAA-98 / CGA009) OX=258594 GN=cbbT1 PE=3 SV=1	1	7	7	7	6	7	6	7	6	7	13.4	13.4	13.4	68.863	655	655	0	49.427	11.8	13.4	198200000	92884000	105320000	6393700	2996200	3397400	86744000	103100000	6	8	14				47	23;113;131;237;274;416;449	True;True;True;True;True;True;True	26;125;144;260;297;462;498	112;113;342;343;388;824;825;906;907;1419;1420;1792;1793	263;264;583;584;639;1337;1338;1458;1459;1460;2255;2256;3100;3101;3102	264;583;639;1338;1458;2256;3100
tr|Q6N9P6|Q6N9P6_RHOPAUncharacterizedproteinOS=Rhodopseudomonaspalustris(strainATCCBAA-98/CGA009)OX=258594GN=RPA1494PE=4SV=1	tr|Q6N9P6|Q6N9P6_RHOPAUncharacterizedproteinOS=Rhodopseudomonaspalustris(strainATCCBAA-98/CGA009)OX=258594GN=RPA1494PE=4SV=1	7	7	7	tr|Q6N9P6|Q6N9P6_RHOPA Uncharacterized protein OS=Rhodopseudomonas palustris (strain ATCC BAA-98 / CGA009) OX=258594 GN=RPA1494 PE=4 SV=1	1	7	7	7	7	6	7	6	7	6	46.8	46.8	46.8	22.587	216	216	0	123.93	46.8	43.5	553850000	269080000	284770000	46154000	22424000	23731000	271770000	228510000	11	12	23				103	16;199;276;286;366;402;412	True;True;True;True;True;True;True	19;218;299;310;411;448;458	101;102;702;703;910;911;946;1288;1289;1290;1386;1387;1388;1408;1409	250;251;1177;1178;1463;1464;1526;2045;2046;2047;2048;2049;2050;2051;2052;2209;2210;2211;2212;2213;2214;2241;2242;2243;2244	250;1177;1463;1526;2049;2210;2242
CON__ENSEMBL:ENSP00000377550;CON__P13646-1	CON__ENSEMBL:ENSP00000377550;CON__P13646-1	6;5	1;1	1;1	;	2	6	1	1	6	6	1	1	1	1	12.1	2.4	2.4	45.771	420	420;458	0.009009	6.3175	12.1	12.1	7370300	3430800	3939600	283470	131950	151520	0	3626900	1	1	2			+	0	28;201;239;249;342;434	False;True;False;False;False;False	31;220;262;272;382;480	121;122;706;707;828;829;830;855;856;1213;1214;1679;1680;1681	274;275;1181;1182;1341;1342;1343;1377;1378;1379;1380;1381;1956;1957;2849;2850;2851;2852	275;1182;1341;1380;1956;2850
CON__Q6NXH9;CON__Q32MB2	CON__Q6NXH9;CON__Q32MB2	6;5	2;2	0;0	;	2	6	2	0	5	6	1	2	0	0	8.9	3.7	0	58.911	539	539;540	0	13.052	7.4	8.9	10222000	3937800	6283700	352470	135790	216680	0	5785000	1	1	2			+	15	100;119;229;263;313;489	False;False;False;False;True;True	110;131;252;286;350;542	306;307;353;354;774;775;880;881;1123;1124;2036	540;541;594;595;1260;1261;1421;1422;1423;1827;1828;3569	540;594;1260;1423;1827;3569
sp|Q6N5C3|NDK_RHOPANucleosidediphosphatekinaseOS=Rhodopseudomonaspalustris(strainATCCBAA-98/CGA009)OX=258594GN=ndkPE=3SV=1	sp|Q6N5C3|NDK_RHOPANucleosidediphosphatekinaseOS=Rhodopseudomonaspalustris(strainATCCBAA-98/CGA009)OX=258594GN=ndkPE=3SV=1	6	6	6	sp|Q6N5C3|NDK_RHOPA Nucleoside diphosphate kinase OS=Rhodopseudomonas palustris (strain ATCC BAA-98 / CGA009) OX=258594 GN=ndk PE=3 SV=1	1	6	6	6	5	6	5	6	5	6	54.3	54.3	54.3	15.219	140	140	0	61.409	46.4	54.3	669470000	321590000	347890000	95639000	45941000	49698000	332670000	288120000	11	14	25				31	66;75;189;308;375;413	True;True;True;True;True;True	71;82;83;206;345;420;459	217;239;240;241;242;243;661;662;1107;1108;1315;1316;1410;1411;1412;1413	406;434;435;436;437;438;439;440;441;442;443;1118;1119;1120;1121;1122;1800;1801;2090;2091;2092;2245;2246;2247;2248	406;440;1118;1800;2092;2248	25	90
sp|Q6NCX8|DAPB_RHOPA4-hydroxy-tetrahydrodipicolinatereductaseOS=Rhodopseudomonaspalustris(strainATCCBAA-98/CGA009)OX=258594GN=dapBPE=3SV=1	sp|Q6NCX8|DAPB_RHOPA4-hydroxy-tetrahydrodipicolinatereductaseOS=Rhodopseudomonaspalustris(strainATCCBAA-98/CGA009)OX=258594GN=dapBPE=3SV=1	6	6	6	sp|Q6NCX8|DAPB_RHOPA 4-hydroxy-tetrahydrodipicolinate reductase OS=Rhodopseudomonas palustris (strain ATCC BAA-98 / CGA009) OX=258594 GN=dapB PE=3 SV=1	1	6	6	6	5	6	5	6	5	6	29.9	29.9	29.9	27.783	271	271	0	47.3	26.6	29.9	153710000	78627000	75082000	12809000	6552300	6256800	75889000	71861000	6	7	13				39	227;231;232;260;372;447	True;True;True;True;True;True	250;254;255;283;417;495	770;771;777;778;779;780;874;1307;1308;1720;1721;1722	1256;1257;1263;1264;1265;1266;1415;2081;2082;2083;2910;2911;2912	1257;1264;1265;1415;2082;2911
tr|Q6NCB5|Q6NCB5_RHOPACysteinesynthaseOS=Rhodopseudomonaspalustris(strainATCCBAA-98/CGA009)OX=258594GN=cysKPE=3SV=1	tr|Q6NCB5|Q6NCB5_RHOPACysteinesynthaseOS=Rhodopseudomonaspalustris(strainATCCBAA-98/CGA009)OX=258594GN=cysKPE=3SV=1	6	6	6	tr|Q6NCB5|Q6NCB5_RHOPA Cysteine synthase OS=Rhodopseudomonas palustris (strain ATCC BAA-98 / CGA009) OX=258594 GN=cysK PE=3 SV=1	1	6	6	6	4	6	4	6	4	6	24.1	24.1	24.1	34.543	332	332	0	62.148	13	24.1	450530000	196780000	253760000	25030000	10932000	14098000	237000000	193400000	8	9	17				114	205;207;294;311;399;475	True;True;True;True;True;True	224;226;322;348;445;526	714;715;717;718;977;1117;1118;1119;1120;1379;1380;1849	1189;1190;1191;1193;1194;1195;1196;1565;1818;1819;1820;1821;1822;1823;2200;2201;3197	1190;1194;1565;1818;2200;3197
CON__P19013	CON__P19013	5	1	1		1	5	1	1	3	5	0	1	0	1	7.6	1.5	1.5	63.91	594	594	0.0090909	6.3934	4.7	7.6	3948000	0	3948000	127350	0	127350	0	3634700	0	1	1			+	10	37;100;313;471;489	False;False;False;True;False	40;110;350;521;542	141;142;306;307;1123;1124;1839;2036	302;303;304;305;306;540;541;1827;1828;3178;3569	303;540;1827;3178;3569
sp|P35107|LHB2_RHOPALight-harvestingproteinB-800-850betachainBOS=Rhodopseudomonaspalustris(strainATCCBAA-98/CGA009)OX=258594GN=pucBEPE=1SV=2	sp|P35107|LHB2_RHOPALight-harvestingproteinB-800-850betachainBOS=Rhodopseudomonaspalustris(strainATCCBAA-98/CGA009)OX=258594GN=pucBEPE=1SV=2	5	4	3	sp|P35107|LHB2_RHOPA Light-harvesting protein B-800-850 beta chain B OS=Rhodopseudomonas palustris (strain ATCC BAA-98 / CGA009) OX=258594 GN=pucBE PE=1 SV=2	1	5	4	3	5	5	4	4	3	3	58.8	58.8	45.1	5.7315	51	51	0	71.71	58.8	58.8	11326000000	5875500000	5451000000	2831600000	1468900000	1362700000	5380900000	4511200000	118	102	220				21	10;182;288;289;478	True;True;True;True;False	10;11;199;312;313;314;315;529	18;19;20;21;22;23;24;25;26;27;28;29;30;31;32;33;34;35;36;37;38;39;40;41;42;43;44;45;46;47;48;49;50;51;52;53;54;55;56;57;58;59;60;61;62;63;64;65;66;67;68;69;70;71;72;73;74;75;76;77;78;79;80;81;82;83;84;85;637;638;639;640;641;642;643;644;645;646;647;648;649;950;951;952;953;954;955;956;957;958;959;960;961;962;963;1854;1855;1856;1857;1858;1859;1860;1861;1862;1863;1864;1865;1866;1867;1868;1869;1870;18…	23;24;25;26;27;28;29;30;31;32;33;34;35;36;37;38;39;40;41;42;43;44;45;46;47;48;49;50;51;52;53;54;55;56;57;58;59;60;61;62;63;64;65;66;67;68;69;70;71;72;73;74;75;76;77;78;79;80;81;82;83;84;85;86;87;88;89;90;91;92;93;94;95;96;97;98;99;100;101;102;103;104;105;106;107;108;109;110;111;112;113;114;115;116;117;118;119;120;121;122;123;124;125;126;127;128;129;130;131;132;133;134;135;136;137;138;139;140;141;…	55;1088;1532;1543;3396	21	1
sp|P35109|LHB4_RHOPALight-harvestingproteinB-800-850betachainDOS=Rhodopseudomonaspalustris(strainATCCBAA-98/CGA009)OX=258594GN=pucBDPE=1SV=1	sp|P35109|LHB4_RHOPALight-harvestingproteinB-800-850betachainDOS=Rhodopseudomonaspalustris(strainATCCBAA-98/CGA009)OX=258594GN=pucBDPE=1SV=1	5	5	4	sp|P35109|LHB4_RHOPA Light-harvesting protein B-800-850 beta chain D OS=Rhodopseudomonas palustris (strain ATCC BAA-98 / CGA009) OX=258594 GN=pucBD PE=1 SV=1	1	5	5	4	5	5	5	5	4	4	58.8	58.8	58.8	5.7876	51	51	0	167.04	58.8	58.8	40333000000	19991000000	20342000000	10083000000	4997800000	5085500000	12408000000	10865000000	329	327	656				23	181;299;300;448;478	True;True;True;True;True	198;329;330;331;332;333;334;335;496;497;529	633;634;635;636;993;994;995;996;997;998;999;1000;1001;1002;1003;1004;1005;1006;1007;1008;1009;1010;1011;1012;1013;1014;1015;1016;1017;1018;1019;1020;1021;1022;1023;1024;1025;1026;1027;1028;1029;1030;1031;1032;1033;1034;1035;1036;1037;1038;1039;1040;1041;1042;1043;1044;1045;1046;1047;1048;1049;1050;1051;1052;1053;1054;1055;1056;1057;1058;1059;1060;1061;1062;1063;1064;1065;1066;1067;1068;1069;1070;…	1078;1079;1080;1081;1082;1083;1594;1595;1596;1597;1598;1599;1600;1601;1602;1603;1604;1605;1606;1607;1608;1609;1610;1611;1612;1613;1614;1615;1616;1617;1618;1619;1620;1621;1622;1623;1624;1625;1626;1627;1628;1629;1630;1631;1632;1633;1634;1635;1636;1637;1638;1639;1640;1641;1642;1643;1644;1645;1646;1647;1648;1649;1650;1651;1652;1653;1654;1655;1656;1657;1658;1659;1660;1661;1662;1663;1664;1665;1666;1667…	1081;1603;1740;3036;3396	22	1
sp|Q6N3P9|GLGB_RHOPA1,4-alpha-glucanbranchingenzymeGlgBOS=Rhodopseudomonaspalustris(strainATCCBAA-98/CGA009)OX=258594GN=glgBPE=3SV=1	sp|Q6N3P9|GLGB_RHOPA1,4-alpha-glucanbranchingenzymeGlgBOS=Rhodopseudomonaspalustris(strainATCCBAA-98/CGA009)OX=258594GN=glgBPE=3SV=1	5	5	5	sp|Q6N3P9|GLGB_RHOPA 1,4-alpha-glucan branching enzyme GlgB OS=Rhodopseudomonas palustris (strain ATCC BAA-98 / CGA009) OX=258594 GN=glgB PE=3 SV=1	1	5	5	5	4	5	4	5	4	5	7.8	7.8	7.8	80.565	716	716	0	44.62	5.9	7.8	82579000	42457000	40121000	2502400	1286600	1215800	36785000	42610000	5	5	10				29	90;348;405;473;500	True;True;True;True;True	100;389;451;523;554	281;282;1238;1239;1393;1394;1843;2057;2058	501;502;1986;1987;2219;2220;3184;3596;3597;3598	502;1987;2220;3184;3597
tr|A0A4Z7|A0A4Z7_RHOPAReactioncenterproteinMchainOS=Rhodopseudomonaspalustris(strainATCCBAA-98/CGA009)OX=258594GN=pufMPE=3SV=1	tr|A0A4Z7|A0A4Z7_RHOPAReactioncenterproteinMchainOS=Rhodopseudomonaspalustris(strainATCCBAA-98/CGA009)OX=258594GN=pufMPE=3SV=1	5	5	5	tr|A0A4Z7|A0A4Z7_RHOPA Reaction center protein M chain OS=Rhodopseudomonas palustris (strain ATCC BAA-98 / CGA009) OX=258594 GN=pufM PE=3 SV=1	1	5	5	5	5	5	5	5	5	5	22.8	22.8	22.8	34.429	307	307	0	59.785	22.8	22.8	895370000	476080000	419300000	111920000	59509000	52412000	388510000	357170000	11	14	25				42	38;88;94;176;487	True;True;True;True;True	41;97;98;104;191;539;540	143;144;145;146;272;273;274;275;276;277;295;296;611;612;2027;2028;2029	307;308;309;310;311;491;492;493;494;495;496;497;518;519;520;521;522;523;524;1049;1050;1051;3559;3560;3561;3562	307;497;521;1051;3559	27;28	238;256
tr|A0A4Z9|A0A4Z9_RHOPAHsubunitofphotosyntheticreactioncentercomplexOS=Rhodopseudomonaspalustris(strainATCCBAA-98/CGA009)OX=258594GN=puhAPE=4SV=1	tr|A0A4Z9|A0A4Z9_RHOPAHsubunitofphotosyntheticreactioncentercomplexOS=Rhodopseudomonaspalustris(strainATCCBAA-98/CGA009)OX=258594GN=puhAPE=4SV=1	5	5	5	tr|A0A4Z9|A0A4Z9_RHOPA H subunit of photosynthetic reaction center complex OS=Rhodopseudomonas palustris (strain ATCC BAA-98 / CGA009) OX=258594 GN=puhA PE=4 SV=1	1	5	5	5	5	5	5	5	5	5	23.9	23.9	23.9	27.242	255	255	0	68.057	23.9	23.9	1327200000	563690000	763520000	110600000	46974000	63627000	565060000	695890000	21	22	43				43	15;87;133;193;472	True;True;True;True;True	18;96;146;210;522	96;97;98;99;100;270;271;391;392;671;672;1840;1841;1842	230;231;232;233;234;235;236;237;238;239;240;241;242;243;244;245;246;247;248;249;485;486;487;488;489;490;642;643;644;645;646;647;648;1133;1134;1135;1136;1137;3179;3180;3181;3182;3183	245;490;643;1133;3181
tr|Q6N1N2|Q6N1N2_RHOPAPossibleproteaseOS=Rhodopseudomonaspalustris(strainATCCBAA-98/CGA009)OX=258594GN=RPA4373PE=3SV=1	tr|Q6N1N2|Q6N1N2_RHOPAPossibleproteaseOS=Rhodopseudomonaspalustris(strainATCCBAA-98/CGA009)OX=258594GN=RPA4373PE=3SV=1	5	5	5	tr|Q6N1N2|Q6N1N2_RHOPA Possible protease OS=Rhodopseudomonas palustris (strain ATCC BAA-98 / CGA009) OX=258594 GN=RPA4373 PE=3 SV=1	1	5	5	5	5	3	5	3	5	3	14	14	14	51.372	477	477	0	38.264	14	7.3	90670000	45809000	44861000	3626800	1832400	1794500	41574000	45536000	4	3	7				54	35;41;224;262;430	True;True;True;True;True	38;44;247;285;476	137;138;149;150;762;763;879;1668	298;299;314;315;1246;1247;1420;2838	299;314;1246;1420;2838
tr|Q6N1R3|Q6N1R3_RHOPALactamase_Bdomain-containingproteinOS=Rhodopseudomonaspalustris(strainATCCBAA-98/CGA009)OX=258594GN=RPA4341PE=4SV=1	tr|Q6N1R3|Q6N1R3_RHOPALactamase_Bdomain-containingproteinOS=Rhodopseudomonaspalustris(strainATCCBAA-98/CGA009)OX=258594GN=RPA4341PE=4SV=1	5	5	5	tr|Q6N1R3|Q6N1R3_RHOPA Lactamase_B domain-containing protein OS=Rhodopseudomonas palustris (strain ATCC BAA-98 / CGA009) OX=258594 GN=RPA4341 PE=4 SV=1	1	5	5	5	4	3	4	3	4	3	13.3	13.3	13.3	72.123	661	661	0	57.252	9.7	8.3	39251000	17176000	22075000	1090300	477110	613210	15576000	21924000	4	4	8				56	30;281;302;456;463	True;True;True;True;True	33;304;337;505;512	125;126;935;1088;1089;1806;1817	282;283;1513;1773;1774;1775;3120;3145	283;1513;1774;3120;3145
tr|Q6N372|Q6N372_RHOPAUncharacterizedproteinOS=Rhodopseudomonaspalustris(strainATCCBAA-98/CGA009)OX=258594GN=RPA3822PE=4SV=1	tr|Q6N372|Q6N372_RHOPAUncharacterizedproteinOS=Rhodopseudomonaspalustris(strainATCCBAA-98/CGA009)OX=258594GN=RPA3822PE=4SV=1	5	5	5	tr|Q6N372|Q6N372_RHOPA Uncharacterized protein OS=Rhodopseudomonas palustris (strain ATCC BAA-98 / CGA009) OX=258594 GN=RPA3822 PE=4 SV=1	1	5	5	5	5	4	5	4	5	4	57	57	57	11.94	107	107	0	125.84	57	49.5	1122300000	494450000	627820000	187050000	82409000	104640000	539660000	516630000	6	14	20				63	97;99;152;253;291	True;True;True;True;True	107;109;165;276;318;319	301;302;303;305;513;514;863;864;967;968;969;970;971;972;973	532;533;534;535;536;537;539;858;859;860;861;1403;1404;1551;1552;1553;1554;1555;1556;1557;1558;1559	532;539;859;1404;1556	38	92
tr|Q6N5G5|Q6N5G5_RHOPAUncharacterizedproteinOS=Rhodopseudomonaspalustris(strainATCCBAA-98/CGA009)OX=258594GN=RPA3011PE=4SV=1	tr|Q6N5G5|Q6N5G5_RHOPAUncharacterizedproteinOS=Rhodopseudomonaspalustris(strainATCCBAA-98/CGA009)OX=258594GN=RPA3011PE=4SV=1	5	5	5	tr|Q6N5G5|Q6N5G5_RHOPA Uncharacterized protein OS=Rhodopseudomonas palustris (strain ATCC BAA-98 / CGA009) OX=258594 GN=RPA3011 PE=4 SV=1	1	5	5	5	4	5	4	5	4	5	34.9	34.9	34.9	22.235	212	212	0	70.408	29.2	34.9	345600000	166590000	179010000	26585000	12815000	13770000	162090000	169300000	3	5	8				73	40;52;151;165;365	True;True;True;True;True	43;57;164;179;410	148;180;181;511;512;542;543;1286;1287	313;359;360;856;857;889;890;2043;2044	313;360;856;889;2043
tr|Q6N747|Q6N747_RHOPAAcetamidase/FormamidaseOS=Rhodopseudomonaspalustris(strainATCCBAA-98/CGA009)OX=258594GN=RPA2415PE=4SV=1	tr|Q6N747|Q6N747_RHOPAAcetamidase/FormamidaseOS=Rhodopseudomonaspalustris(strainATCCBAA-98/CGA009)OX=258594GN=RPA2415PE=4SV=1	5	5	5	tr|Q6N747|Q6N747_RHOPA Acetamidase/Formamidase OS=Rhodopseudomonas palustris (strain ATCC BAA-98 / CGA009) OX=258594 GN=RPA2415 PE=4 SV=1	1	5	5	5	4	5	4	5	4	5	21.3	21.3	21.3	35.782	329	329	0	46.307	17	21.3	75105000	45984000	29121000	5007000	3065600	1941400	43085000	29709000	5	6	11				87	135;228;374;464;496	True;True;True;True;True	148;251;419;513;550	394;772;773;1311;1312;1313;1314;1818;1819;2050;2051	650;1258;1259;2086;2087;2088;2089;3146;3147;3588;3589	650;1258;2086;3146;3589
tr|Q6ND42|Q6ND42_RHOPAThioredoxindomain-containingproteinOS=Rhodopseudomonaspalustris(strainATCCBAA-98/CGA009)OX=258594GN=trxPE=3SV=1	tr|Q6ND42|Q6ND42_RHOPAThioredoxindomain-containingproteinOS=Rhodopseudomonaspalustris(strainATCCBAA-98/CGA009)OX=258594GN=trxPE=3SV=1	5	5	5	tr|Q6ND42|Q6ND42_RHOPA Thioredoxin domain-containing protein OS=Rhodopseudomonas palustris (strain ATCC BAA-98 / CGA009) OX=258594 GN=trx PE=3 SV=1	1	5	5	5	4	4	4	4	4	4	17	17	17	32.811	306	306	0	39.61	14.4	13.1	184540000	105450000	79092000	10856000	6203100	4652500	83501000	94766000	10	8	18				121	70;74;80;105;443	True;True;True;True;True	75;81;89;115;489	223;224;238;259;260;319;320;1698;1699;1700;1701	413;414;415;416;417;433;469;470;471;472;473;553;554;555;2877;2878;2879;2880;2881	416;433;472;555;2881
CON__P00761	CON__P00761	4	4	4		1	4	4	4	4	4	4	4	4	4	25.1	25.1	25.1	24.409	231	231	0	87.988	25.1	25.1	8577800000	4096400000	4481500000	779800000	372400000	407410000	3800900000	4139300000	43	40	83			+	1	196;251;277;445	True;True;True;True	213;214;274;300;492	676;677;678;679;680;681;682;683;684;685;686;859;860;912;913;914;915;916;917;918;919;920;921;1707;1708;1709;1710;1711;1712;1713;1714;1715;1716	1144;1145;1146;1147;1148;1149;1150;1151;1152;1153;1154;1155;1156;1157;1158;1159;1160;1384;1385;1386;1387;1388;1389;1390;1391;1392;1393;1394;1395;1396;1397;1398;1465;1466;1467;1468;1469;1470;1471;1472;1473;1474;1475;1476;1477;1478;1479;1480;1481;1482;1483;1484;1485;1486;1487;1488;1489;1490;1491;1492;1493;1494;1495;1496;2887;2888;2889;2890;2891;2892;2893;2894;2895;2896;2897;2898;2899;2900;2901;2902…	1147;1386;1466;2893	0	94
sp|P35106|LHB1_RHOPALight-harvestingproteinB-800-850betachainAOS=Rhodopseudomonaspalustris(strainATCCBAA-98/CGA009)OX=258594GN=pucBAPE=1SV=2	sp|P35106|LHB1_RHOPALight-harvestingproteinB-800-850betachainAOS=Rhodopseudomonaspalustris(strainATCCBAA-98/CGA009)OX=258594GN=pucBAPE=1SV=2	4	3	3	sp|P35106|LHB1_RHOPA Light-harvesting protein B-800-850 beta chain A OS=Rhodopseudomonas palustris (strain ATCC BAA-98 / CGA009) OX=258594 GN=pucBA PE=1 SV=2	1	4	3	3	3	4	2	3	2	3	53.2	53.2	53.2	5.281	47	47	0	176.07	53.2	53.2	39276000000	14326000000	24950000000	13092000000	4775200000	8316700000	11129000000	10625000000	268	272	540				20	11;182;426;427	True;False;True;True	12;199;472;473	86;87;637;638;639;640;641;642;643;644;645;646;647;648;649;1441;1442;1443;1444;1445;1446;1447;1448;1449;1450;1451;1452;1453;1454;1455;1456;1457;1458;1459;1460;1461;1462;1463;1464;1465;1466;1467;1468;1469;1470;1471;1472;1473;1474;1475;1476;1477;1478;1479;1480;1481;1482;1483;1484;1485;1486;1487;1488;1489;1490;1491;1492;1493;1494;1495;1496;1497;1498;1499;1500;1501;1502;1503;1504;1505;1506;1507;1508;1…	219;220;1084;1085;1086;1087;1088;1089;1090;1091;1092;1093;1094;1095;1096;1097;1098;1099;1100;2293;2294;2295;2296;2297;2298;2299;2300;2301;2302;2303;2304;2305;2306;2307;2308;2309;2310;2311;2312;2313;2314;2315;2316;2317;2318;2319;2320;2321;2322;2323;2324;2325;2326;2327;2328;2329;2330;2331;2332;2333;2334;2335;2336;2337;2338;2339;2340;2341;2342;2343;2344;2345;2346;2347;2348;2349;2350;2351;2352;2353;2…	220;1088;2549;2834
sp|Q6N898|PSD_RHOPAPhosphatidylserinedecarboxylaseproenzymeOS=Rhodopseudomonaspalustris(strainATCCBAA-98/CGA009)OX=258594GN=psdPE=3SV=2	sp|Q6N898|PSD_RHOPAPhosphatidylserinedecarboxylaseproenzymeOS=Rhodopseudomonaspalustris(strainATCCBAA-98/CGA009)OX=258594GN=psdPE=3SV=2	4	4	4	sp|Q6N898|PSD_RHOPA Phosphatidylserine decarboxylase proenzyme OS=Rhodopseudomonas palustris (strain ATCC BAA-98 / CGA009) OX=258594 GN=psd PE=3 SV=2	1	4	4	4	4	4	4	4	4	4	15.5	15.5	15.5	25.339	232	232	0	25.387	15.5	15.5	223390000	82979000	140410000	18616000	6914900	11701000	100620000	107990000	5	8	13				36	34;56;86;215	True;True;True;True	37;61;95;235	133;134;135;136;195;196;268;269;737;738	292;293;294;295;296;297;374;375;376;377;482;483;484;1218;1219	294;376;484;1218
tr|Q6N1N1|Q6N1N1_RHOPAPutativeproteaseOS=Rhodopseudomonaspalustris(strainATCCBAA-98/CGA009)OX=258594GN=RPA4374PE=3SV=1	tr|Q6N1N1|Q6N1N1_RHOPAPutativeproteaseOS=Rhodopseudomonaspalustris(strainATCCBAA-98/CGA009)OX=258594GN=RPA4374PE=3SV=1	4	4	4	tr|Q6N1N1|Q6N1N1_RHOPA Putative protease OS=Rhodopseudomonas palustris (strain ATCC BAA-98 / CGA009) OX=258594 GN=RPA4374 PE=3 SV=1	1	4	4	4	3	4	3	4	3	4	12	12	12	53.935	493	493	0	31.817	7.3	12	44786000	13734000	31052000	1492900	457800	1035100	18892000	23430000	4	4	8				53	134;209;245;373	True;True;True;True	147;228;268;418	393;723;724;725;849;850;1309;1310	649;1201;1202;1203;1204;1368;1369;2084;2085	649;1204;1368;2084
tr|Q6N489|Q6N489_RHOPAAldedhdomain-containingproteinOS=Rhodopseudomonaspalustris(strainATCCBAA-98/CGA009)OX=258594GN=RPA3450PE=4SV=1	tr|Q6N489|Q6N489_RHOPAAldedhdomain-containingproteinOS=Rhodopseudomonaspalustris(strainATCCBAA-98/CGA009)OX=258594GN=RPA3450PE=4SV=1	4	4	4	tr|Q6N489|Q6N489_RHOPA Aldedh domain-containing protein OS=Rhodopseudomonas palustris (strain ATCC BAA-98 / CGA009) OX=258594 GN=RPA3450 PE=4 SV=1	1	4	4	4	2	3	2	3	2	3	10.2	10.2	10.2	53.378	498	498	0	58.691	6.4	7.2	32102000	10395000	21707000	1234700	399820	834870	0	19984000	3	2	5				68	43;82;368;439	True;True;True;True	48;91;413;485	163;164;262;1301;1688	334;335;336;475;2071;2863	336;475;2071;2863
tr|Q6N543|Q6N543_RHOPAHITdomain-containingproteinOS=Rhodopseudomonaspalustris(strainATCCBAA-98/CGA009)OX=258594GN=RPA3140PE=4SV=1	tr|Q6N543|Q6N543_RHOPAHITdomain-containingproteinOS=Rhodopseudomonaspalustris(strainATCCBAA-98/CGA009)OX=258594GN=RPA3140PE=4SV=1	4	4	4	tr|Q6N543|Q6N543_RHOPA HIT domain-containing protein OS=Rhodopseudomonas palustris (strain ATCC BAA-98 / CGA009) OX=258594 GN=RPA3140 PE=4 SV=1	1	4	4	4	3	4	3	4	3	4	35.9	35.9	35.9	17.1	156	156	0	34.536	29.5	35.9	170320000	75146000	95170000	17032000	7514600	9517000	83939000	75601000	7	8	15				70	216;223;307;395	True;True;True;True	236;237;246;344;440	739;740;741;742;760;761;1103;1104;1105;1106;1368	1220;1221;1222;1223;1242;1243;1244;1245;1794;1795;1796;1797;1798;1799;2184	1221;1245;1799;2184	39	50
tr|Q6N5T2|Q6N5T2_RHOPATriosephosphateisomeraseOS=Rhodopseudomonaspalustris(strainATCCBAA-98/CGA009)OX=258594GN=cbbJPE=3SV=1	tr|Q6N5T2|Q6N5T2_RHOPATriosephosphateisomeraseOS=Rhodopseudomonaspalustris(strainATCCBAA-98/CGA009)OX=258594GN=cbbJPE=3SV=1	4	4	4	tr|Q6N5T2|Q6N5T2_RHOPA Triosephosphate isomerase OS=Rhodopseudomonas palustris (strain ATCC BAA-98 / CGA009) OX=258594 GN=cbbJ PE=3 SV=1	1	4	4	4	4	4	4	4	4	4	17.6	17.6	17.6	28.165	278	278	0	27.206	17.6	17.6	151580000	63380000	88201000	11660000	4875400	6784700	57287000	73519000	7	6	13				77	111;203;346;433	True;True;True;True	122;123;222;387;479	336;337;338;339;710;711;1221;1222;1677;1678	574;575;576;577;578;579;580;1185;1186;1965;1966;2847;2848	579;1185;1965;2847	44	233
tr|Q6N7V6|Q6N7V6_RHOPABeta-lactamasedomain-containingproteinOS=Rhodopseudomonaspalustris(strainATCCBAA-98/CGA009)OX=258594GN=RPA2148PE=4SV=1	tr|Q6N7V6|Q6N7V6_RHOPABeta-lactamasedomain-containingproteinOS=Rhodopseudomonaspalustris(strainATCCBAA-98/CGA009)OX=258594GN=RPA2148PE=4SV=1	4	4	4	tr|Q6N7V6|Q6N7V6_RHOPA Beta-lactamase domain-containing protein OS=Rhodopseudomonas palustris (strain ATCC BAA-98 / CGA009) OX=258594 GN=RPA2148 PE=4 SV=1	1	4	4	4	3	4	3	4	3	4	10.2	10.2	10.2	45.662	422	422	0	25.79	8.3	10.2	135110000	66596000	68512000	7947500	3917400	4030100	75796000	53874000	4	5	9				89	200;270;349;429	True;True;True;True	219;293;390;475	704;705;893;894;1240;1241;1242;1243;1667	1179;1180;1444;1445;1988;1989;1990;1991;2837	1179;1444;1990;2837
tr|Q6N8M4|Q6N8M4_RHOPACBAHdomain-containingproteinOS=Rhodopseudomonaspalustris(strainATCCBAA-98/CGA009)OX=258594GN=RPA1879PE=3SV=1	tr|Q6N8M4|Q6N8M4_RHOPACBAHdomain-containingproteinOS=Rhodopseudomonaspalustris(strainATCCBAA-98/CGA009)OX=258594GN=RPA1879PE=3SV=1	4	4	4	tr|Q6N8M4|Q6N8M4_RHOPA CBAH domain-containing protein OS=Rhodopseudomonas palustris (strain ATCC BAA-98 / CGA009) OX=258594 GN=RPA1879 PE=3 SV=1	1	4	4	4	4	4	4	4	4	4	13.8	13.8	13.8	38.584	355	355	0	108.54	13.8	13.8	231770000	84731000	147040000	16555000	6052200	10503000	83099000	130050000	6	6	12				92	58;117;285;431	True;True;True;True	63;129;309;477	201;202;350;351;944;945;1669;1670;1671;1672;1673;1674	383;384;385;386;591;592;1524;1525;2839;2840;2841;2842;2843;2844	386;591;1525;2841
tr|Q6NAE3|Q6NAE3_RHOPAPutativelong-chain-fatty-acidCoAligaseOS=Rhodopseudomonaspalustris(strainATCCBAA-98/CGA009)OX=258594GN=fadD1PE=1SV=1	tr|Q6NAE3|Q6NAE3_RHOPAPutativelong-chain-fatty-acidCoAligaseOS=Rhodopseudomonaspalustris(strainATCCBAA-98/CGA009)OX=258594GN=fadD1PE=1SV=1	4	4	4	tr|Q6NAE3|Q6NAE3_RHOPA Putative long-chain-fatty-acid CoA ligase OS=Rhodopseudomonas palustris (strain ATCC BAA-98 / CGA009) OX=258594 GN=fadD1 PE=1 SV=1	1	4	4	4	3	4	3	4	3	4	9.3	9.3	9.3	53.402	503	503	0	29.94	7.8	9.3	35137000	13125000	22012000	1527700	570650	957040	17446000	15944000	2	4	6				105	45;59;103;301	True;True;True;True	50;64;113;336	166;167;203;204;316;317;1087	338;339;340;387;388;550;551;1772	339;388;550;1772
tr|Q6NBN4|Q6NBN4_RHOPACarbonicanhydraseOS=Rhodopseudomonaspalustris(strainATCCBAA-98/CGA009)OX=258594GN=acaPPE=3SV=1	tr|Q6NBN4|Q6NBN4_RHOPACarbonicanhydraseOS=Rhodopseudomonaspalustris(strainATCCBAA-98/CGA009)OX=258594GN=acaPPE=3SV=1	4	4	4	tr|Q6NBN4|Q6NBN4_RHOPA Carbonic anhydrase OS=Rhodopseudomonas palustris (strain ATCC BAA-98 / CGA009) OX=258594 GN=acaP PE=3 SV=1	1	4	4	4	4	4	4	4	4	4	25	25	25	27.007	252	252	0	54.869	25	25	149820000	65765000	84059000	16647000	7307200	9339900	59379000	65493000	11	11	22				111	9;214;293;364	True;True;True;True	9;233;234;321;409	16;17;732;733;734;735;736;975;976;1282;1283;1284;1285	18;19;20;21;22;1211;1212;1213;1214;1215;1216;1217;1561;1562;1563;1564;2037;2038;2039;2040;2041;2042	19;1215;1564;2037	48;49	140;168
tr|Q6NCQ8|Q6NCQ8_RHOPAInorganicpyrophosphataseOS=Rhodopseudomonaspalustris(strainATCCBAA-98/CGA009)OX=258594GN=ppaPE=3SV=1	tr|Q6NCQ8|Q6NCQ8_RHOPAInorganicpyrophosphataseOS=Rhodopseudomonaspalustris(strainATCCBAA-98/CGA009)OX=258594GN=ppaPE=3SV=1	4	4	4	tr|Q6NCQ8|Q6NCQ8_RHOPA Inorganic pyrophosphatase OS=Rhodopseudomonas palustris (strain ATCC BAA-98 / CGA009) OX=258594 GN=ppa PE=3 SV=1	1	4	4	4	3	3	3	3	3	3	27.5	27.5	27.5	19.751	178	178	0	34.912	21.3	22.5	119150000	55220000	63932000	14894000	6902400	7991600	59636000	54442000	3	4	7				117	5;153;258;441	True;True;True;True	5;166;281;487	10;515;869;870;1692;1693;1694;1695	10;862;1409;1410;2870;2871;2872;2873	10;862;1410;2870
CON__Q5D862	CON__Q5D862	3	3	3		1	3	3	3	3	3	3	3	3	3	1.7	1.7	1.7	248.07	2391	2391	0	23.141	1.7	1.7	58135000	27170000	30965000	785600	367160	418440	27203000	28475000	4	4	8			+	14	123;316;400	True;True;True	135;355;446	365;366;1149;1150;1381;1382	610;611;1863;1864;2202;2203;2204;2205	611;1864;2203
tr|Q6N1A4|Q6N1A4_RHOPAAcetyl-CoAsynthetaseOS=Rhodopseudomonaspalustris(strainATCCBAA-98/CGA009)OX=258594GN=RPA4504PE=4SV=1	tr|Q6N1A4|Q6N1A4_RHOPAAcetyl-CoAsynthetaseOS=Rhodopseudomonaspalustris(strainATCCBAA-98/CGA009)OX=258594GN=RPA4504PE=4SV=1	3	3	3	tr|Q6N1A4|Q6N1A4_RHOPA Acetyl-CoA synthetase OS=Rhodopseudomonas palustris (strain ATCC BAA-98 / CGA009) OX=258594 GN=RPA4504 PE=4 SV=1	1	3	3	3	1	2	1	2	1	2	5	5	5	69.38	636	636	0	17.412	2.2	2.8	55966000	3000600	52965000	1554600	83349	1471300	0	48762000	1	1	2				50	222;380;423	True;True;True	245;425;469	759;1330;1435	1241;2112;2280	1241;2112;2280
tr|Q6N1N5|Q6N1N5_RHOPABranched-chain-amino-acidaminotransferaseOS=Rhodopseudomonaspalustris(strainATCCBAA-98/CGA009)OX=258594GN=ilvEPE=3SV=1	tr|Q6N1N5|Q6N1N5_RHOPABranched-chain-amino-acidaminotransferaseOS=Rhodopseudomonaspalustris(strainATCCBAA-98/CGA009)OX=258594GN=ilvEPE=3SV=1	3	3	3	tr|Q6N1N5|Q6N1N5_RHOPA Branched-chain-amino-acid aminotransferase OS=Rhodopseudomonas palustris (strain ATCC BAA-98 / CGA009) OX=258594 GN=ilvE PE=3 SV=1	1	3	3	3	1	2	1	2	1	2	8.6	8.6	8.6	40.119	370	370	0	17.844	2.4	6.2	48654000	0	48654000	2115400	0	2115400	0	44793000	1	1	2				55	81;247;338	True;True;True	90;270;378	261;853;1204	474;1375;1945	474;1375;1945
tr|Q6N1S3|Q6N1S3_RHOPAAminotran_1_2domain-containingproteinOS=Rhodopseudomonaspalustris(strainATCCBAA-98/CGA009)OX=258594GN=aatAPE=4SV=1	tr|Q6N1S3|Q6N1S3_RHOPAAminotran_1_2domain-containingproteinOS=Rhodopseudomonaspalustris(strainATCCBAA-98/CGA009)OX=258594GN=aatAPE=4SV=1	3	3	3	tr|Q6N1S3|Q6N1S3_RHOPA Aminotran_1_2 domain-containing protein OS=Rhodopseudomonas palustris (strain ATCC BAA-98 / CGA009) OX=258594 GN=aatA PE=4 SV=1	1	3	3	3	3	0	3	0	3	0	9	9	9	44.425	411	411	0	18.344	9	0	20293000	20293000	0	1193700	1193700	0	20293000	0	3	0	3				57	195;272;457	True;True;True	212;295;506	675;899;1807	1143;1450;3121	1143;1450;3121
tr|Q6N227|Q6N227_RHOPAResponseregulatorydomain-containingproteinOS=Rhodopseudomonaspalustris(strainATCCBAA-98/CGA009)OX=258594GN=RPA4223PE=4SV=1	tr|Q6N227|Q6N227_RHOPAResponseregulatorydomain-containingproteinOS=Rhodopseudomonaspalustris(strainATCCBAA-98/CGA009)OX=258594GN=RPA4223PE=4SV=1	3	3	3	tr|Q6N227|Q6N227_RHOPA Response regulatory domain-containing protein OS=Rhodopseudomonas palustris (strain ATCC BAA-98 / CGA009) OX=258594 GN=RPA4223 PE=4 SV=1	1	3	3	3	3	3	3	3	3	3	13.4	13.4	13.4	29.317	268	268	0	19.551	13.4	13.4	88809000	36120000	52689000	6343500	2580000	3763500	37254000	47374000	3	3	6				58	275;391;411	True;True;True	298;436;457	908;909;1355;1356;1406;1407	1461;1462;2167;2168;2239;2240	1461;2167;2239
tr|Q6N3R5|Q6N3R5_RHOPAIndole-3-acetamidehydrolaseOS=Rhodopseudomonaspalustris(strainATCCBAA-98/CGA009)OX=258594GN=RPA3628PE=3SV=1	tr|Q6N3R5|Q6N3R5_RHOPAIndole-3-acetamidehydrolaseOS=Rhodopseudomonaspalustris(strainATCCBAA-98/CGA009)OX=258594GN=RPA3628PE=3SV=1	3	3	3	tr|Q6N3R5|Q6N3R5_RHOPA Indole-3-acetamide hydrolase OS=Rhodopseudomonas palustris (strain ATCC BAA-98 / CGA009) OX=258594 GN=RPA3628 PE=3 SV=1	1	3	3	3	2	2	2	2	2	2	9.7	9.7	9.7	49.304	465	465	0	20.761	7.3	5.6	5889400	3052300	2837000	245390	127180	118210	3052300	0	2	4	6				64	243;269;350	True;True;True	266;292;391	845;846;892;1244	1364;1365;1441;1442;1443;1992	1365;1441;1992
tr|Q6N5Q1|Q6N5Q1_RHOPAUncharacterizedproteinOS=Rhodopseudomonaspalustris(strainATCCBAA-98/CGA009)OX=258594GN=RPA2923PE=4SV=1	tr|Q6N5Q1|Q6N5Q1_RHOPAUncharacterizedproteinOS=Rhodopseudomonaspalustris(strainATCCBAA-98/CGA009)OX=258594GN=RPA2923PE=4SV=1	3	3	3	tr|Q6N5Q1|Q6N5Q1_RHOPA Uncharacterized protein OS=Rhodopseudomonas palustris (strain ATCC BAA-98 / CGA009) OX=258594 GN=RPA2923 PE=4 SV=1	1	3	3	3	3	3	3	3	3	3	3.9	3.9	3.9	85.715	829	829	0	21.583	3.9	3.9	43194000	26709000	16485000	1199800	741900	457920	21972000	19913000	3	5	8				75	68;417;437	True;True;True	73;463;483	219;220;1421;1422;1684;1685	408;409;410;2257;2258;2259;2855;2856;2857	410;2259;2855
tr|Q6N9H4|Q6N9H4_RHOPATPM_phosphatasedomain-containingproteinOS=Rhodopseudomonaspalustris(strainATCCBAA-98/CGA009)OX=258594GN=RPA1575PE=4SV=1	tr|Q6N9H4|Q6N9H4_RHOPATPM_phosphatasedomain-containingproteinOS=Rhodopseudomonaspalustris(strainATCCBAA-98/CGA009)OX=258594GN=RPA1575PE=4SV=1	3	3	3	tr|Q6N9H4|Q6N9H4_RHOPA TPM_phosphatase domain-containing protein OS=Rhodopseudomonas palustris (strain ATCC BAA-98 / CGA009) OX=258594 GN=RPA1575 PE=4 SV=1	1	3	3	3	2	2	2	2	2	2	14.5	14.5	14.5	18.548	165	165	0	16.793	9.7	9.1	39310000	15588000	23722000	3931000	1558800	2372200	0	21839000	3	1	4				97	27;108;322	True;True;True	30;119;361	120;330;331;1162	273;567;568;569;1883	273;569;1883
tr|Q6N9N1|Q6N9N1_RHOPAUroporphyrinogendecarboxylaseOS=Rhodopseudomonaspalustris(strainATCCBAA-98/CGA009)OX=258594GN=hemEPE=3SV=1	tr|Q6N9N1|Q6N9N1_RHOPAUroporphyrinogendecarboxylaseOS=Rhodopseudomonaspalustris(strainATCCBAA-98/CGA009)OX=258594GN=hemEPE=3SV=1	3	3	3	tr|Q6N9N1|Q6N9N1_RHOPA Uroporphyrinogen decarboxylase OS=Rhodopseudomonas palustris (strain ATCC BAA-98 / CGA009) OX=258594 GN=hemE PE=3 SV=1	1	3	3	3	2	3	2	3	2	3	15.7	15.7	15.7	35.798	325	325	0	26.286	10.2	15.7	21409000	8155400	13254000	1784100	679610	1104500	9649000	9261500	4	5	9				101	129;244;418	True;True;True	142;267;464	381;382;383;384;385;847;848;1423	630;631;632;633;634;635;1366;1367;2260	632;1366;2260
tr|Q6NAJ3|Q6NAJ3_RHOPAUbiquinol-cytochromecreductaseiron-sulfursubunitOS=Rhodopseudomonaspalustris(strainATCCBAA-98/CGA009)OX=258594GN=RPA1192PE=4SV=1	tr|Q6NAJ3|Q6NAJ3_RHOPAUbiquinol-cytochromecreductaseiron-sulfursubunitOS=Rhodopseudomonaspalustris(strainATCCBAA-98/CGA009)OX=258594GN=RPA1192PE=4SV=1	3	3	3	tr|Q6NAJ3|Q6NAJ3_RHOPA Ubiquinol-cytochrome c reductase iron-sulfur subunit OS=Rhodopseudomonas palustris (strain ATCC BAA-98 / CGA009) OX=258594 GN=RPA1192 PE=4 SV=1	1	3	3	3	3	3	3	3	3	3	21.6	21.6	21.6	22.433	208	208	0	22.452	21.6	21.6	287910000	158590000	129320000	31990000	17621000	14369000	97589000	88092000	5	5	10				107	161;321;333	True;True;True	174;175;360;373	531;532;533;534;535;1160;1161;1194;1195	878;879;880;881;882;1880;1881;1882;1931;1932	881;1882;1932	47	109
tr|Q6NAW1|Q6NAW1_RHOPAAmidohydro-reldomain-containingproteinOS=Rhodopseudomonaspalustris(strainATCCBAA-98/CGA009)OX=258594GN=pyrCPE=3SV=1	tr|Q6NAW1|Q6NAW1_RHOPAAmidohydro-reldomain-containingproteinOS=Rhodopseudomonaspalustris(strainATCCBAA-98/CGA009)OX=258594GN=pyrCPE=3SV=1	3	3	3	tr|Q6NAW1|Q6NAW1_RHOPA Amidohydro-rel domain-containing protein OS=Rhodopseudomonas palustris (strain ATCC BAA-98 / CGA009) OX=258594 GN=pyrC PE=3 SV=1	1	3	3	3	3	3	3	3	3	3	7.2	7.2	7.2	48.616	444	444	0	20.597	7.2	7.2	40577000	14493000	26084000	1502800	536780	966070	16344000	22163000	4	4	8				110	3;126;183	True;True;True	3;138;200	5;6;7;373;374;650;651	5;6;7;620;621;622;1101;1102	6;622;1102
tr|Q6NCB4|Q6NCB4_RHOPAPhosphoribosylaminoimidazole-succinocarboxamidesynthaseOS=Rhodopseudomonaspalustris(strainATCCBAA-98/CGA009)OX=258594GN=purCPE=3SV=1	tr|Q6NCB4|Q6NCB4_RHOPAPhosphoribosylaminoimidazole-succinocarboxamidesynthaseOS=Rhodopseudomonaspalustris(strainATCCBAA-98/CGA009)OX=258594GN=purCPE=3SV=1	3	3	3	tr|Q6NCB4|Q6NCB4_RHOPA Phosphoribosylaminoimidazole-succinocarboxamide synthase OS=Rhodopseudomonas palustris (strain ATCC BAA-98 / CGA009) OX=258594 GN=purC PE=3 SV=1	1	3	3	3	1	3	1	3	1	3	10.8	10.8	10.8	33.568	305	305	0	17.924	3.6	10.8	65825000	4397800	61427000	3291200	219890	3071300	0	56552000	1	5	6				113	25;248;268	True;True;True	28;271;291	116;117;854;891	267;268;269;270;1376;1440	269;1376;1440
tr|Q6NCK7|Q6NCK7_RHOPAPossibletransmembraneproteinOS=Rhodopseudomonaspalustris(strainATCCBAA-98/CGA009)OX=258594GN=RPA0465PE=4SV=1	tr|Q6NCK7|Q6NCK7_RHOPAPossibletransmembraneproteinOS=Rhodopseudomonaspalustris(strainATCCBAA-98/CGA009)OX=258594GN=RPA0465PE=4SV=1	3	3	3	tr|Q6NCK7|Q6NCK7_RHOPA Possible transmembrane protein OS=Rhodopseudomonas palustris (strain ATCC BAA-98 / CGA009) OX=258594 GN=RPA0465 PE=4 SV=1	1	3	3	3	2	3	2	3	2	3	8.6	8.6	8.6	52.127	477	477	0	26.399	6.9	8.6	53459000	26149000	27310000	2056100	1005700	1050400	24137000	23527000	4	6	10				115	158;421;453	True;True;True	171;467;502	522;523;524;1431;1432;1433;1799;1800	869;870;871;2276;2277;2278;3110;3111;3112;3113	871;2277;3111
tr|Q6NDT8|Q6NDT8_RHOPACbb3-typecytochromecoxidasesubunitOS=Rhodopseudomonaspalustris(strainATCCBAA-98/CGA009)OX=258594GN=ccoPPE=3SV=1	tr|Q6NDT8|Q6NDT8_RHOPACbb3-typecytochromecoxidasesubunitOS=Rhodopseudomonaspalustris(strainATCCBAA-98/CGA009)OX=258594GN=ccoPPE=3SV=1	3	3	3	tr|Q6NDT8|Q6NDT8_RHOPA Cbb3-type cytochrome c oxidase subunit OS=Rhodopseudomonas palustris (strain ATCC BAA-98 / CGA009) OX=258594 GN=ccoP PE=3 SV=1	1	3	3	3	2	2	2	2	2	2	14	14	14	31.59	293	293	0	20.086	9.6	10.2	24315000	13102000	11213000	1350800	727920	622920	0	10323000	2	2	4				123	67;156;387	True;True;True	72;169;432	218;519;1346;1347	407;866;2145;2146	407;866;2146
CON__P02662	CON__P02662	2	2	2		1	2	2	2	2	2	2	2	2	2	11.1	11.1	11.1	22.975	199	199	0	13.272	11.1	11.1	17518000	10823000	6695200	1946500	1202500	743910	10267000	6720200	2	2	4			+	3	110;498	True;True	121;552	334;335;2053;2054	572;573;3591;3592	572;3591
CON__P02754	CON__P02754	2	2	2		1	2	2	2	2	2	2	2	2	2	19.1	19.1	19.1	18.281	162	162	0	18.784	19.1	19.1	22276000	10472000	11804000	2025100	952030	1073100	10563000	10776000	3	2	5			+	4	432;480	True;True	478;531	1675;1676;2010;2011	2845;2846;3523;3524;3525	2846;3524
CON__Q86YZ3	CON__Q86YZ3	2	2	2		1	2	2	2	2	1	2	1	2	1	4.5	4.5	4.5	282.39	2850	2850	0	33.575	4.5	1.7	98428000	61473000	36955000	1158000	723210	434760	58399000	37097000	4	2	6			+	16	160;341	True;True	173;381	527;528;529;530;1211;1212	874;875;876;877;1954;1955	877;1955
sp|O83005|RCEL_RHOPAReactioncenterproteinLchainOS=Rhodopseudomonaspalustris(strainATCCBAA-98/CGA009)OX=258594GN=pufLPE=2SV=4	sp|O83005|RCEL_RHOPAReactioncenterproteinLchainOS=Rhodopseudomonaspalustris(strainATCCBAA-98/CGA009)OX=258594GN=pufLPE=2SV=4	2	2	2	sp|O83005|RCEL_RHOPA Reaction center protein L chain OS=Rhodopseudomonas palustris (strain ATCC BAA-98 / CGA009) OX=258594 GN=pufL PE=2 SV=4	1	2	2	2	2	2	2	2	2	2	6.1	6.1	6.1	30.837	277	277	0	23.388	6.1	6.1	179270000	97230000	82041000	35854000	19446000	16408000	94301000	78459000	9	10	19				18	314;389	True;True	351;434	1125;1126;1349;1350;1351;1352	1829;1830;1831;1832;2148;2149;2150;2151;2152;2153;2154;2155;2156;2157;2158;2159;2160;2161;2162	1829;2161
sp|P35108|LHB3_RHOPALight-harvestingproteinB-800-850betachainCOS=Rhodopseudomonaspalustris(strainATCCBAA-98/CGA009)OX=258594GN=pucBCPE=3SV=1	sp|P35108|LHB3_RHOPALight-harvestingproteinB-800-850betachainCOS=Rhodopseudomonaspalustris(strainATCCBAA-98/CGA009)OX=258594GN=pucBCPE=3SV=1	2	2	2	sp|P35108|LHB3_RHOPA Light-harvesting protein B-800-850 beta chain C OS=Rhodopseudomonas palustris (strain ATCC BAA-98 / CGA009) OX=258594 GN=pucBC PE=3 SV=1	1	2	2	2	2	2	2	2	2	2	47.1	47.1	47.1	5.7756	51	51	0	36.767	47.1	47.1	4423700000	1628800000	2794900000	1474600000	542950000	931630000	1154400000	2142400000	28	28	56				22	180;234	True;True	197;257	629;630;631;632;785;786;787;788;789;790;791;792;793;794;795;796;797;798;799;800;801;802;803;804;805;806;807;808;809;810;811;812;813;814;815	1073;1074;1075;1076;1077;1272;1273;1274;1275;1276;1277;1278;1279;1280;1281;1282;1283;1284;1285;1286;1287;1288;1289;1290;1291;1292;1293;1294;1295;1296;1297;1298;1299;1300;1301;1302;1303;1304;1305;1306;1307;1308;1309;1310;1311;1312;1313;1314;1315;1316;1317;1318;1319;1320;1321;1322;1323;1324;1325;1326;1327;1328	1073;1310
sp|Q3V7S0|PDXJ_RHOPAPyridoxine5'-phosphatesynthaseOS=Rhodopseudomonaspalustris(strainATCCBAA-98/CGA009)OX=258594GN=pdxJPE=3SV=1	sp|Q3V7S0|PDXJ_RHOPAPyridoxine5'-phosphatesynthaseOS=Rhodopseudomonaspalustris(strainATCCBAA-98/CGA009)OX=258594GN=pdxJPE=3SV=1	2	2	2	sp|Q3V7S0|PDXJ_RHOPA Pyridoxine 5-phosphate synthase OS=Rhodopseudomonas palustris (strain ATCC BAA-98 / CGA009) OX=258594 GN=pdxJ PE=3 SV=1	1	2	2	2	1	2	1	2	1	2	11.8	11.8	11.8	27.11	254	254	0	13.892	7.1	11.8	34341000	4169900	30171000	3434100	416990	3017100	0	27776000	1	1	2				26	1;254	True;True	1;277	2;3;865	2;3;1405	3;1405
sp|Q6N0W5|F16PA_RHOPAFructose-1,6-bisphosphataseclass1OS=Rhodopseudomonaspalustris(strainATCCBAA-98/CGA009)OX=258594GN=fbpPE=3SV=1	sp|Q6N0W5|F16PA_RHOPAFructose-1,6-bisphosphataseclass1OS=Rhodopseudomonaspalustris(strainATCCBAA-98/CGA009)OX=258594GN=fbpPE=3SV=1	2	2	2	sp|Q6N0W5|F16PA_RHOPA Fructose-1,6-bisphosphatase class 1 OS=Rhodopseudomonas palustris (strain ATCC BAA-98 / CGA009) OX=258594 GN=fbp PE=3 SV=1	1	2	2	2	2	2	2	2	2	2	7.9	7.9	7.9	36.632	343	343	0	15.087	7.9	7.9	40293000	17459000	22834000	3099500	1343000	1756500	16582000	21899000	4	3	7				27	467;483	True;True	516;534	1825;1826;2015;2016	3157;3158;3531;3532;3533;3534;3535	3158;3533
sp|Q6NCN8|PNP_RHOPAPolyribonucleotidenucleotidyltransferaseOS=Rhodopseudomonaspalustris(strainATCCBAA-98/CGA009)OX=258594GN=pnpPE=3SV=1	sp|Q6NCN8|PNP_RHOPAPolyribonucleotidenucleotidyltransferaseOS=Rhodopseudomonaspalustris(strainATCCBAA-98/CGA009)OX=258594GN=pnpPE=3SV=1	2	2	2	sp|Q6NCN8|PNP_RHOPA Polyribonucleotide nucleotidyltransferase OS=Rhodopseudomonas palustris (strain ATCC BAA-98 / CGA009) OX=258594 GN=pnp PE=3 SV=1	1	2	2	2	1	2	1	2	1	2	4	4	4	78.284	722	722	0	14.144	2.8	4	16183000	5264100	10919000	475980	154830	321160	0	10053000	1	2	3				38	102;419	True;True	112;465	314;315;1424	548;549;2261	548;2261
tr|Q6N0W8|Q6N0W8_RHOPAFructose-1,6-bisphosphatealdolaseOS=Rhodopseudomonaspalustris(strainATCCBAA-98/CGA009)OX=258594GN=cbbAPE=3SV=1	tr|Q6N0W8|Q6N0W8_RHOPAFructose-1,6-bisphosphatealdolaseOS=Rhodopseudomonaspalustris(strainATCCBAA-98/CGA009)OX=258594GN=cbbAPE=3SV=1	2	2	2	tr|Q6N0W8|Q6N0W8_RHOPA Fructose-1,6-bisphosphate aldolase OS=Rhodopseudomonas palustris (strain ATCC BAA-98 / CGA009) OX=258594 GN=cbbA PE=3 SV=1	1	2	2	2	2	2	2	2	2	2	5.3	5.3	5.3	39.341	361	361	0	17.679	5.3	5.3	84432000	45270000	39162000	6494800	3482300	3012400	41705000	39619000	2	2	4				48	107;477	True;True	118;528	328;329;1852;1853	565;566;3201;3202	566;3202
tr|Q6N334|Q6N334_RHOPAUncharacterizedproteinOS=Rhodopseudomonaspalustris(strainATCCBAA-98/CGA009)OX=258594GN=RPA3861PE=4SV=1	tr|Q6N334|Q6N334_RHOPAUncharacterizedproteinOS=Rhodopseudomonaspalustris(strainATCCBAA-98/CGA009)OX=258594GN=RPA3861PE=4SV=1	2	2	2	tr|Q6N334|Q6N334_RHOPA Uncharacterized protein OS=Rhodopseudomonas palustris (strain ATCC BAA-98 / CGA009) OX=258594 GN=RPA3861 PE=4 SV=1	1	2	2	2	2	2	2	2	2	2	25	25	25	12.584	128	128	0	18.209	25	25	56430000	21959000	34471000	9405000	3659900	5745100	22268000	31426000	1	2	3				62	55;162	True;True	60;176	193;194;536;537	372;373;883;884	372;884
tr|Q6N3X8|Q6N3X8_RHOPABeta_elim_lyasedomain-containingproteinOS=Rhodopseudomonaspalustris(strainATCCBAA-98/CGA009)OX=258594GN=RPA3564PE=3SV=1	tr|Q6N3X8|Q6N3X8_RHOPABeta_elim_lyasedomain-containingproteinOS=Rhodopseudomonaspalustris(strainATCCBAA-98/CGA009)OX=258594GN=RPA3564PE=3SV=1	2	2	2	tr|Q6N3X8|Q6N3X8_RHOPA Beta_elim_lyase domain-containing protein OS=Rhodopseudomonas palustris (strain ATCC BAA-98 / CGA009) OX=258594 GN=RPA3564 PE=3 SV=1	1	2	2	2	2	1	2	1	2	1	5.8	5.8	5.8	53.701	482	482	0	10.914	5.8	2.7	11454000	6365700	5088800	424240	235770	188470	6365700	0	1	1	2				65	109;257	True;True	120;280	332;333;868	570;571;1408	571;1408
tr|Q6N5F6|Q6N5F6_RHOPAAldo_ket_reddomain-containingproteinOS=Rhodopseudomonaspalustris(strainATCCBAA-98/CGA009)OX=258594GN=RPA3023PE=4SV=1	tr|Q6N5F6|Q6N5F6_RHOPAAldo_ket_reddomain-containingproteinOS=Rhodopseudomonaspalustris(strainATCCBAA-98/CGA009)OX=258594GN=RPA3023PE=4SV=1	2	2	2	tr|Q6N5F6|Q6N5F6_RHOPA Aldo_ket_red domain-containing protein OS=Rhodopseudomonas palustris (strain ATCC BAA-98 / CGA009) OX=258594 GN=RPA3023 PE=4 SV=1	1	2	2	2	2	0	2	0	2	0	11	11	11	35.315	328	328	0	18.975	11	0	10571000	10571000	0	660690	660690	0	10571000	0	2	0	2				72	149;187	True;True	162;204	448;658	767;1112	767;1112
tr|Q6N6L1|Q6N6L1_RHOPAPeptidyl-prolylcis-transisomeraseOS=Rhodopseudomonaspalustris(strainATCCBAA-98/CGA009)OX=258594GN=RPA2604PE=3SV=1	tr|Q6N6L1|Q6N6L1_RHOPAPeptidyl-prolylcis-transisomeraseOS=Rhodopseudomonaspalustris(strainATCCBAA-98/CGA009)OX=258594GN=RPA2604PE=3SV=1	2	2	2	tr|Q6N6L1|Q6N6L1_RHOPA Peptidyl-prolyl cis-trans isomerase OS=Rhodopseudomonas palustris (strain ATCC BAA-98 / CGA009) OX=258594 GN=RPA2604 PE=3 SV=1	1	2	2	2	2	1	2	1	2	1	13.5	13.5	13.5	16.926	155	155	0	12.244	13.5	6.5	27882000	16609000	11273000	2788200	1660900	1127300	16609000	0	3	1	4				82	19;83	True;True	22;92	106;107;263	257;258;476;477	258;477
tr|Q6N6X3|Q6N6X3_RHOPAN-acetyl-gamma-glutamyl-phosphatereductaseOS=Rhodopseudomonaspalustris(strainATCCBAA-98/CGA009)OX=258594GN=argCPE=3SV=1	tr|Q6N6X3|Q6N6X3_RHOPAN-acetyl-gamma-glutamyl-phosphatereductaseOS=Rhodopseudomonaspalustris(strainATCCBAA-98/CGA009)OX=258594GN=argCPE=3SV=1	2	2	2	tr|Q6N6X3|Q6N6X3_RHOPA N-acetyl-gamma-glutamyl-phosphate reductase OS=Rhodopseudomonas palustris (strain ATCC BAA-98 / CGA009) OX=258594 GN=argC PE=3 SV=1	1	2	2	2	0	2	0	2	0	2	6	6	6	34.521	331	331	0	11.69	0	6	12025000	0	12025000	601260	0	601260	0	11071000	0	2	2				83	191;459	True;True	208;508	666;1809	1127;3123	1127;3123
tr|Q6N705|Q6N705_RHOPANi_hydr_CYTBdomain-containingproteinOS=Rhodopseudomonaspalustris(strainATCCBAA-98/CGA009)OX=258594GN=RPA2458PE=4SV=1	tr|Q6N705|Q6N705_RHOPANi_hydr_CYTBdomain-containingproteinOS=Rhodopseudomonaspalustris(strainATCCBAA-98/CGA009)OX=258594GN=RPA2458PE=4SV=1	2	2	2	tr|Q6N705|Q6N705_RHOPA Ni_hydr_CYTB domain-containing protein OS=Rhodopseudomonas palustris (strain ATCC BAA-98 / CGA009) OX=258594 GN=RPA2458 PE=4 SV=1	1	2	2	2	1	2	1	2	1	2	10.8	10.8	10.8	20.3	186	186	0	11.891	3.8	10.8	38165000	11342000	26823000	4770700	1417800	3352900	0	24695000	0	0	0				84	44;212	True;True	49;231	165;729;730	337;1208;1209	337;1209
tr|Q6NCD4|Q6NCD4_RHOPAPorinOS=Rhodopseudomonaspalustris(strainATCCBAA-98/CGA009)OX=258594GN=RPA0538PE=3SV=1;tr|Q6N744|Q6N744_RHOPAPorinOS=Rhodopseudomonaspalustris(strainATCCBAA-98/CGA009)OX=258594GN=RPA2419PE=3SV=1;tr|Q6N4B6|Q6N4B6_RHOPAPorinOS=Rhodopseudomonaspalustris(strainATCCBAA-98/CGA009)OX=258594GN=RPA3423PE=3SV=1	tr|Q6NCD4|Q6NCD4_RHOPAPorinOS=Rhodopseudomonaspalustris(strainATCCBAA-98/CGA009)OX=258594GN=RPA0538PE=3SV=1;tr|Q6N744|Q6N744_RHOPAPorinOS=Rhodopseudomonaspalustris(strainATCCBAA-98/CGA009)OX=258594GN=RPA2419PE=3SV=1;tr|Q6N4B6|Q6N4B6_RHOPAPorinOS=Rhodopseudomonaspalustris(strainATCCBAA-98/CGA009)OX=258594GN=RPA3423PE=3SV=1	2;2;1	2;2;1	2;2;1	tr|Q6NCD4|Q6NCD4_RHOPA Porin OS=Rhodopseudomonas palustris (strain ATCC BAA-98 / CGA009) OX=258594 GN=RPA0538 PE=3 SV=1;tr|Q6N744|Q6N744_RHOPA Porin OS=Rhodopseudomonas palustris (strain ATCC BAA-98 / CGA009) OX=258594 GN=RPA2419 PE=3 SV=1;tr|Q6N4B6|Q6N4B6	3	2	2	2	2	1	2	1	2	1	5.6	5.6	5.6	51.346	484	484;484;499	0	14.268	5.6	1.9	25009000	11494000	13515000	1786400	821020	965360	11494000	0	2	1	3				86	406;452	True;True	452;501	1395;1396;1798	2221;2222;3109	2222;3109
tr|Q6ND31|Q6ND31_RHOPAAminotransferaseOS=Rhodopseudomonaspalustris(strainATCCBAA-98/CGA009)OX=258594GN=RPA0278PE=3SV=1	tr|Q6ND31|Q6ND31_RHOPAAminotransferaseOS=Rhodopseudomonaspalustris(strainATCCBAA-98/CGA009)OX=258594GN=RPA0278PE=3SV=1	2	2	2	tr|Q6ND31|Q6ND31_RHOPA Aminotransferase OS=Rhodopseudomonas palustris (strain ATCC BAA-98 / CGA009) OX=258594 GN=RPA0278 PE=3 SV=1	1	2	2	2	1	2	1	2	1	2	5.3	5.3	5.3	46.378	431	431	0	11.815	2.8	5.3	10584000	3663300	6920500	529190	183170	346030	0	6371300	1	2	3				119	85;104	True;True	94;114	266;267;318	480;481;552	480;552
tr|Q6NDN2|Q6NDN2_RHOPAThioredoxinOS=Rhodopseudomonaspalustris(strainATCCBAA-98/CGA009)OX=258594GN=trxAPE=3SV=1	tr|Q6NDN2|Q6NDN2_RHOPAThioredoxinOS=Rhodopseudomonaspalustris(strainATCCBAA-98/CGA009)OX=258594GN=trxAPE=3SV=1	2	2	2	tr|Q6NDN2|Q6NDN2_RHOPA Thioredoxin OS=Rhodopseudomonas palustris (strain ATCC BAA-98 / CGA009) OX=258594 GN=trxA PE=3 SV=1	1	2	2	2	2	2	2	2	2	2	23.6	23.6	23.6	11.253	106	106	0	13.896	23.6	23.6	28942000	14018000	14924000	4134600	2002600	2132000	10623000	13647000	3	2	5				122	267;495	True;True	290;548;549	889;890;2047;2048;2049	1438;1439;3585;3586;3587	1439;3586	51;52	72;78
sp|P35104|LHA4_RHOPALight-harvestingproteinB-800-850alphachainDOS=Rhodopseudomonaspalustris(strainATCCBAA-98/CGA009)OX=258594GN=pucADPE=1SV=1	sp|P35104|LHA4_RHOPALight-harvestingproteinB-800-850alphachainDOS=Rhodopseudomonaspalustris(strainATCCBAA-98/CGA009)OX=258594GN=pucADPE=1SV=1	1	1	1	sp|P35104|LHA4_RHOPA Light-harvesting protein B-800-850 alpha chain D OS=Rhodopseudomonas palustris (strain ATCC BAA-98 / CGA009) OX=258594 GN=pucAD PE=1 SV=1	1	1	1	1	1	1	1	1	1	1	15.3	15.3	15.3	6.3646	59	59	0.0083333	6.0481	15.3	15.3	160380000	60060000	100320000	160380000	60060000	100320000	0	92354000	0	1	1				19	0	True	0	0;1	0;1	1
sp|P60365|CH602_RHOPA60kDachaperonin2OS=Rhodopseudomonaspalustris(strainATCCBAA-98/CGA009)OX=258594GN=groL2PE=3SV=1;sp|P60364|CH601_RHOPA60kDachaperonin1OS=Rhodopseudomonaspalustris(strainATCCBAA-98/CGA009)OX=258594GN=groL1PE=3SV=1	sp|P60365|CH602_RHOPA60kDachaperonin2OS=Rhodopseudomonaspalustris(strainATCCBAA-98/CGA009)OX=258594GN=groL2PE=3SV=1;sp|P60364|CH601_RHOPA60kDachaperonin1OS=Rhodopseudomonaspalustris(strainATCCBAA-98/CGA009)OX=258594GN=groL1PE=3SV=1	1;1	1;1	1;1	sp|P60365|CH602_RHOPA 60 kDa chaperonin 2 OS=Rhodopseudomonas palustris (strain ATCC BAA-98 / CGA009) OX=258594 GN=groL2 PE=3 SV=1;sp|P60364|CH601_RHOPA 60 kDa chaperonin 1 OS=Rhodopseudomonas palustris (strain ATCC BAA-98 / CGA009) OX=258594 GN=groL1 PE=3	2	1	1	1	1	1	1	1	1	1	2.2	2.2	2.2	57.795	547	547;547	0	8.7535	2.2	2.2	56023000	23936000	32087000	1807200	772120	1035100	0	13026000	7	9	16				24	42	True	45;46;47	151;152;153;154;155;156;157;158;159;160;161;162	316;317;318;319;320;321;322;323;324;325;326;327;328;329;330;331;332;333	323	23;24	111;114
sp|P61706|SYA_RHOPAAlanine--tRNAligaseOS=Rhodopseudomonaspalustris(strainATCCBAA-98/CGA009)OX=258594GN=alaSPE=3SV=1	sp|P61706|SYA_RHOPAAlanine--tRNAligaseOS=Rhodopseudomonaspalustris(strainATCCBAA-98/CGA009)OX=258594GN=alaSPE=3SV=1	1	1	1	sp|P61706|SYA_RHOPA Alanine--tRNA ligase OS=Rhodopseudomonas palustris (strain ATCC BAA-98 / CGA009) OX=258594 GN=alaS PE=3 SV=1	1	1	1	1	1	1	1	1	1	1	1.2	1.2	1.2	96.166	889	889	0	11.112	1.2	1.2	0	0	0	0	0	0	0	0	1	1	2				25	159	True	172	525;526	872;873	873
sp|Q6N3F3|HPNE_RHOPAHydroxysqualenedehydroxylaseOS=Rhodopseudomonaspalustris(strainATCCBAA-98/CGA009)OX=258594GN=hpnEPE=1SV=1	sp|Q6N3F3|HPNE_RHOPAHydroxysqualenedehydroxylaseOS=Rhodopseudomonaspalustris(strainATCCBAA-98/CGA009)OX=258594GN=hpnEPE=1SV=1	1	1	1	sp|Q6N3F3|HPNE_RHOPA Hydroxysqualene dehydroxylase OS=Rhodopseudomonas palustris (strain ATCC BAA-98 / CGA009) OX=258594 GN=hpnE PE=1 SV=1	1	1	1	1	0	1	0	1	0	1	3.1	3.1	3.1	43.828	418	418	0	8.5647	0	3.1	2778900	0	2778900	126310	0	126310	0	2558300	0	1	1				28	18	True	21	105	256	256
sp|Q6N4S0|RPOC_RHOPADNA-directedRNApolymerasesubunitbeta'OS=Rhodopseudomonaspalustris(strainATCCBAA-98/CGA009)OX=258594GN=rpoCPE=3SV=1	sp|Q6N4S0|RPOC_RHOPADNA-directedRNApolymerasesubunitbeta'OS=Rhodopseudomonaspalustris(strainATCCBAA-98/CGA009)OX=258594GN=rpoCPE=3SV=1	1	1	1	sp|Q6N4S0|RPOC_RHOPA DNA-directed RNA polymerase subunit beta OS=Rhodopseudomonas palustris (strain ATCC BAA-98 / CGA009) OX=258594 GN=rpoC PE=3 SV=1	1	1	1	1	1	1	1	1	1	1	1	1	1	156.05	1402	1402	0	10.203	1	1	7938700	4614800	3324000	96814	56278	40536	0	3060200	2	2	4				30	252	True	275	861;862	1399;1400;1401;1402	1401
sp|Q6N5M4|NUOC_RHOPANADH-quinoneoxidoreductasesubunitCOS=Rhodopseudomonaspalustris(strainATCCBAA-98/CGA009)OX=258594GN=nuoCPE=3SV=1	sp|Q6N5M4|NUOC_RHOPANADH-quinoneoxidoreductasesubunitCOS=Rhodopseudomonaspalustris(strainATCCBAA-98/CGA009)OX=258594GN=nuoCPE=3SV=1	1	1	1	sp|Q6N5M4|NUOC_RHOPA NADH-quinone oxidoreductase subunit C OS=Rhodopseudomonas palustris (strain ATCC BAA-98 / CGA009) OX=258594 GN=nuoC PE=3 SV=1	1	1	1	1	1	1	1	1	1	1	7.4	7.4	7.4	23.141	204	204	0	12.435	7.4	7.4	9030900	4949500	4081400	1128900	618690	510170	0	3757500	1	1	2				32	116	True	128	348;349	589;590	589
sp|Q6N6M5|ISPDF_RHOPABifunctionalenzymeIspD/IspFOS=Rhodopseudomonaspalustris(strainATCCBAA-98/CGA009)OX=258594GN=ispDFPE=3SV=1	sp|Q6N6M5|ISPDF_RHOPABifunctionalenzymeIspD/IspFOS=Rhodopseudomonaspalustris(strainATCCBAA-98/CGA009)OX=258594GN=ispDFPE=3SV=1	1	1	1	sp|Q6N6M5|ISPDF_RHOPA Bifunctional enzyme IspD/IspF OS=Rhodopseudomonas palustris (strain ATCC BAA-98 / CGA009) OX=258594 GN=ispDF PE=3 SV=1	1	1	1	1	1	1	1	1	1	1	2.8	2.8	2.8	41.66	398	398	0	7.014	2.8	2.8	15991000	9316600	6674600	888400	517590	370810	0	6144900	1	1	2				33	184	True	201	652;653	1103;1104	1103
sp|Q6N765|METE_RHOPA5-methyltetrahydropteroyltriglutamate--homocysteinemethyltransferaseOS=Rhodopseudomonaspalustris(strainATCCBAA-98/CGA009)OX=258594GN=metEPE=3SV=1	sp|Q6N765|METE_RHOPA5-methyltetrahydropteroyltriglutamate--homocysteinemethyltransferaseOS=Rhodopseudomonaspalustris(strainATCCBAA-98/CGA009)OX=258594GN=metEPE=3SV=1	1	1	1	sp|Q6N765|METE_RHOPA 5-methyltetrahydropteroyltriglutamate--homocysteine methyltransferase OS=Rhodopseudomonas palustris (strain ATCC BAA-98 / CGA009) OX=258594 GN=metE PE=3 SV=1	1	1	1	1	1	1	1	1	1	1	0.9	0.9	0.9	86.301	788	788	0	7.9895	0.9	0.9	15704000	8686800	7017300	365210	202020	163190	0	6460400	1	1	2				34	238	True	261	826;827	1339;1340	1339
sp|Q6N869|ILVC_RHOPAKetol-acidreductoisomerase(NADP(+))OS=Rhodopseudomonaspalustris(strainATCCBAA-98/CGA009)OX=258594GN=ilvCPE=3SV=1	sp|Q6N869|ILVC_RHOPAKetol-acidreductoisomerase(NADP(+))OS=Rhodopseudomonaspalustris(strainATCCBAA-98/CGA009)OX=258594GN=ilvCPE=3SV=1	1	1	1	sp|Q6N869|ILVC_RHOPA Ketol-acid reductoisomerase (NADP(+)) OS=Rhodopseudomonas palustris (strain ATCC BAA-98 / CGA009) OX=258594 GN=ilvC PE=3 SV=1	1	1	1	1	1	1	1	1	1	1	3.2	3.2	3.2	37.106	339	339	0.0088496	6.1494	3.2	3.2	21625000	16251000	5374500	1029800	773850	255930	0	4947900	1	1	2				35	12	True	13;14	88;89	221;222	222	26	127
sp|Q6N8C3|RPIA_RHOPARibose-5-phosphateisomeraseAOS=Rhodopseudomonaspalustris(strainATCCBAA-98/CGA009)OX=258594GN=rpiAPE=3SV=1	sp|Q6N8C3|RPIA_RHOPARibose-5-phosphateisomeraseAOS=Rhodopseudomonaspalustris(strainATCCBAA-98/CGA009)OX=258594GN=rpiAPE=3SV=1	1	1	1	sp|Q6N8C3|RPIA_RHOPA Ribose-5-phosphate isomerase A OS=Rhodopseudomonas palustris (strain ATCC BAA-98 / CGA009) OX=258594 GN=rpiA PE=3 SV=1	1	1	1	1	1	0	1	0	1	0	6.9	6.9	6.9	24.676	232	232	0	7.3639	6.9	0	6073800	6073800	0	506150	506150	0	6073800	0	1	0	1				37	121	True	133	362	606	606
sp|Q6NCY8|RNPH_RHOPARibonucleasePHOS=Rhodopseudomonaspalustris(strainATCCBAA-98/CGA009)OX=258594GN=rphPE=3SV=1	sp|Q6NCY8|RNPH_RHOPARibonucleasePHOS=Rhodopseudomonaspalustris(strainATCCBAA-98/CGA009)OX=258594GN=rphPE=3SV=1	1	1	1	sp|Q6NCY8|RNPH_RHOPA Ribonuclease PH OS=Rhodopseudomonas palustris (strain ATCC BAA-98 / CGA009) OX=258594 GN=rph PE=3 SV=1	1	1	1	1	1	1	1	1	1	1	4.2	4.2	4.2	25.979	237	237	0.0092593	6.4341	4.2	4.2	10113000	4203500	5909600	1264100	525430	738700	0	5440600	1	1	2				40	283	True	307	940;941	1520;1521	1521
tr|Q6N0E2|Q6N0E2_RHOPAS-methyl-5'-thioadenosinephosphorylaseOS=Rhodopseudomonaspalustris(strainATCCBAA-98/CGA009)OX=258594GN=mtnPPE=3SV=1	tr|Q6N0E2|Q6N0E2_RHOPAS-methyl-5'-thioadenosinephosphorylaseOS=Rhodopseudomonaspalustris(strainATCCBAA-98/CGA009)OX=258594GN=mtnPPE=3SV=1	1	1	1	tr|Q6N0E2|Q6N0E2_RHOPA S-methyl-5-thioadenosine phosphorylase OS=Rhodopseudomonas palustris (strain ATCC BAA-98 / CGA009) OX=258594 GN=mtnP PE=3 SV=1	1	1	1	1	1	1	1	1	1	1	4.5	4.5	4.5	31.642	291	291	0	7.8371	4.5	4.5	5894600	2253500	3641000	346740	132560	214180	0	3352100	1	1	2				44	155	True	168	517;518	864;865	864
tr|Q6N0K2|Q6N0K2_RHOPAUncharacterizedproteinOS=Rhodopseudomonaspalustris(strainATCCBAA-98/CGA009)OX=258594GN=RPA4760PE=4SV=1	tr|Q6N0K2|Q6N0K2_RHOPAUncharacterizedproteinOS=Rhodopseudomonaspalustris(strainATCCBAA-98/CGA009)OX=258594GN=RPA4760PE=4SV=1	1	1	1	tr|Q6N0K2|Q6N0K2_RHOPA Uncharacterized protein OS=Rhodopseudomonas palustris (strain ATCC BAA-98 / CGA009) OX=258594 GN=RPA4760 PE=4 SV=1	1	1	1	1	1	1	1	1	1	1	7.3	7.3	7.3	18.443	177	177	0	46.239	7.3	7.3	24331000	14181000	10150000	2211900	1289200	922750	0	9344700	1	1	2				45	317	True	356	1151;1152	1865;1866	1866
tr|Q6N0X2|Q6N0X2_RHOPAMethyl-acceptingchemotaxisreceptor/sensorytransducerOS=Rhodopseudomonaspalustris(strainATCCBAA-98/CGA009)OX=258594GN=RPA4638PE=4SV=1	tr|Q6N0X2|Q6N0X2_RHOPAMethyl-acceptingchemotaxisreceptor/sensorytransducerOS=Rhodopseudomonaspalustris(strainATCCBAA-98/CGA009)OX=258594GN=RPA4638PE=4SV=1	1	1	1	tr|Q6N0X2|Q6N0X2_RHOPA Methyl-accepting chemotaxis receptor/sensory transducer OS=Rhodopseudomonas palustris (strain ATCC BAA-98 / CGA009) OX=258594 GN=RPA4638 PE=4 SV=1	1	1	1	1	1	1	1	1	1	1	1.8	1.8	1.8	59.271	565	565	1	-2	1.8	1.8	0	0	0	0	0	0	0	0	1	1	2	+			49	296	True	324	982;983	1572;1573	1572	31;32	1;3
tr|Q6N1K1|Q6N1K1_RHOPAPutativeperiplasmicbindingABCtransporterprotein,probablesugarbindingOS=Rhodopseudomonaspalustris(strainATCCBAA-98/CGA009)OX=258594GN=RPA4404PE=4SV=1	tr|Q6N1K1|Q6N1K1_RHOPAPutativeperiplasmicbindingABCtransporterprotein,probablesugarbindingOS=Rhodopseudomonaspalustris(strainATCCBAA-98/CGA009)OX=258594GN=RPA4404PE=4SV=1	1	1	1	tr|Q6N1K1|Q6N1K1_RHOPA Putative periplasmic binding ABC transporter protein, probable sugar binding OS=Rhodopseudomonas palustris (strain ATCC BAA-98 / CGA009) OX=258594 GN=RPA4404 PE=4 SV=1	1	1	1	1	1	1	1	1	1	1	3	3	3	66.713	596	596	0	8.0058	3	3	18290000	9374600	8915100	522560	267850	254720	0	8207600	1	1	2				51	327	True	367	1181;1182	1910;1911	1911
tr|Q6N1L6|Q6N1L6_RHOPASmallConductanceMechanosensitive(MscS)IonChannelOS=Rhodopseudomonaspalustris(strainATCCBAA-98/CGA009)OX=258594GN=RPA4389PE=3SV=1	tr|Q6N1L6|Q6N1L6_RHOPASmallConductanceMechanosensitive(MscS)IonChannelOS=Rhodopseudomonaspalustris(strainATCCBAA-98/CGA009)OX=258594GN=RPA4389PE=3SV=1	1	1	1	tr|Q6N1L6|Q6N1L6_RHOPA Small Conductance Mechanosensitive (MscS) Ion Channel OS=Rhodopseudomonas palustris (strain ATCC BAA-98 / CGA009) OX=258594 GN=RPA4389 PE=3 SV=1	1	1	1	1	1	1	1	1	1	1	1.9	1.9	1.9	67.251	620	620	0	6.8698	1.9	1.9	5238700	5238700	0	180650	180650	0	5238700	0	3	5	8				52	53	True	58	182;183;184;185;186;187;188;189	361;362;363;364;365;366;367;368	364
tr|Q6N270|Q6N270_RHOPANAD(P)transhydrogenasesubunitbetaOS=Rhodopseudomonaspalustris(strainATCCBAA-98/CGA009)OX=258594GN=pntBPE=3SV=1	tr|Q6N270|Q6N270_RHOPANAD(P)transhydrogenasesubunitbetaOS=Rhodopseudomonaspalustris(strainATCCBAA-98/CGA009)OX=258594GN=pntBPE=3SV=1	1	1	1	tr|Q6N270|Q6N270_RHOPA NAD(P) transhydrogenase subunit beta OS=Rhodopseudomonas palustris (strain ATCC BAA-98 / CGA009) OX=258594 GN=pntB PE=3 SV=1	1	1	1	1	1	1	1	1	1	1	2.4	2.4	2.4	48.112	467	467	1	-2	2.4	2.4	8723500	4816900	3906600	726960	401410	325550	0	3596600	1	1	2	+			59	63	True	68	213;214	400;401	400	33;34	448;449
tr|Q6N2H9|Q6N2H9_RHOPACarbamoyl-phosphatesynthaselargechainOS=Rhodopseudomonaspalustris(strainATCCBAA-98/CGA009)OX=258594GN=carBPE=3SV=1	tr|Q6N2H9|Q6N2H9_RHOPACarbamoyl-phosphatesynthaselargechainOS=Rhodopseudomonaspalustris(strainATCCBAA-98/CGA009)OX=258594GN=carBPE=3SV=1	1	1	1	tr|Q6N2H9|Q6N2H9_RHOPA Carbamoyl-phosphate synthase large chain OS=Rhodopseudomonas palustris (strain ATCC BAA-98 / CGA009) OX=258594 GN=carB PE=3 SV=1	1	1	1	1	1	1	1	1	1	1	1.2	1.2	1.2	120.1	1109	1109	0.0086957	6.1244	1.2	1.2	24392000	10627000	13765000	443490	193220	250270	0	12673000	1	1	2				60	204	True	223	712;713	1187;1188	1187	35	905
tr|Q6N320|Q6N320_RHOPAUncharacterizedproteinOS=Rhodopseudomonaspalustris(strainATCCBAA-98/CGA009)OX=258594GN=RPA3875PE=4SV=1	tr|Q6N320|Q6N320_RHOPAUncharacterizedproteinOS=Rhodopseudomonaspalustris(strainATCCBAA-98/CGA009)OX=258594GN=RPA3875PE=4SV=1	1	1	1	tr|Q6N320|Q6N320_RHOPA Uncharacterized protein OS=Rhodopseudomonas palustris (strain ATCC BAA-98 / CGA009) OX=258594 GN=RPA3875 PE=4 SV=1	1	1	1	1	1	1	1	1	1	1	10.2	10.2	10.2	10.092	98	98	0.0086207	6.1072	10.2	10.2	24395000	11654000	12742000	4879100	2330800	2548300	0	9563900	2	4	6				61	282	True	305;306	936;937;938;939	1514;1515;1516;1517;1518;1519	1514	36;37	11;15
tr|Q6N415|Q6N415_RHOPAD-alanine--D-alanineligaseOS=Rhodopseudomonaspalustris(strainATCCBAA-98/CGA009)OX=258594GN=ddlAPE=3SV=1	tr|Q6N415|Q6N415_RHOPAD-alanine--D-alanineligaseOS=Rhodopseudomonaspalustris(strainATCCBAA-98/CGA009)OX=258594GN=ddlAPE=3SV=1	1	1	1	tr|Q6N415|Q6N415_RHOPA D-alanine--D-alanine ligase OS=Rhodopseudomonas palustris (strain ATCC BAA-98 / CGA009) OX=258594 GN=ddlA PE=3 SV=1	1	1	1	1	1	1	1	1	1	1	4.3	4.3	4.3	35.057	329	329	0	22.929	4.3	4.3	57725000	20491000	37234000	3207000	1138400	2068500	0	34279000	1	1	2				66	32	True	35	129;130	288;289	289
tr|Q6N459|Q6N459_RHOPAUncharacterizedproteinOS=Rhodopseudomonaspalustris(strainATCCBAA-98/CGA009)OX=258594GN=RPA3481PE=4SV=1	tr|Q6N459|Q6N459_RHOPAUncharacterizedproteinOS=Rhodopseudomonaspalustris(strainATCCBAA-98/CGA009)OX=258594GN=RPA3481PE=4SV=1	1	1	1	tr|Q6N459|Q6N459_RHOPA Uncharacterized protein OS=Rhodopseudomonas palustris (strain ATCC BAA-98 / CGA009) OX=258594 GN=RPA3481 PE=4 SV=1	1	1	1	1	1	1	1	1	1	1	18.8	18.8	18.8	9.1175	80	80	0	6.8003	18.8	18.8	80208000	32726000	47482000	16042000	6545200	9496400	0	27254000	4	3	7				67	279	True	302	923;924;925;926;927;928	1498;1499;1500;1501;1502;1503;1504;1505;1506	1505
tr|Q6N5C1|Q6N5C1_RHOPAUncharacterizedproteinOS=Rhodopseudomonaspalustris(strainATCCBAA-98/CGA009)OX=258594GN=RPA3058PE=4SV=1	tr|Q6N5C1|Q6N5C1_RHOPAUncharacterizedproteinOS=Rhodopseudomonaspalustris(strainATCCBAA-98/CGA009)OX=258594GN=RPA3058PE=4SV=1	1	1	1	tr|Q6N5C1|Q6N5C1_RHOPA Uncharacterized protein OS=Rhodopseudomonas palustris (strain ATCC BAA-98 / CGA009) OX=258594 GN=RPA3058 PE=4 SV=1	1	1	1	1	0	1	0	1	0	1	8.4	8.4	8.4	19.077	179	179	0	7.3446	0	8.4	5689600	0	5689600	711200	0	711200	0	5238100	0	1	1				71	154	True	167	516	863	863
tr|Q6N5K0|Q6N5K0_RHOPAIndole-3-acetamidehydrolaseOS=Rhodopseudomonaspalustris(strainATCCBAA-98/CGA009)OX=258594GN=RPA2974PE=3SV=1	tr|Q6N5K0|Q6N5K0_RHOPAIndole-3-acetamidehydrolaseOS=Rhodopseudomonaspalustris(strainATCCBAA-98/CGA009)OX=258594GN=RPA2974PE=3SV=1	1	1	1	tr|Q6N5K0|Q6N5K0_RHOPA Indole-3-acetamide hydrolase OS=Rhodopseudomonas palustris (strain ATCC BAA-98 / CGA009) OX=258594 GN=RPA2974 PE=3 SV=1	1	1	1	1	1	0	1	0	1	0	2.9	2.9	2.9	50.29	476	476	0.0084746	6.0722	2.9	0	1278100	1278100	0	51122	51122	0	1278100	0	0	0	0				74	344	True	385	1219	1963	1963
tr|Q6N5W0|Q6N5W0_RHOPAUncharacterizedproteinOS=Rhodopseudomonaspalustris(strainATCCBAA-98/CGA009)OX=258594GN=RPA2860PE=4SV=1	tr|Q6N5W0|Q6N5W0_RHOPAUncharacterizedproteinOS=Rhodopseudomonaspalustris(strainATCCBAA-98/CGA009)OX=258594GN=RPA2860PE=4SV=1	1	1	1	tr|Q6N5W0|Q6N5W0_RHOPA Uncharacterized protein OS=Rhodopseudomonas palustris (strain ATCC BAA-98 / CGA009) OX=258594 GN=RPA2860 PE=4 SV=1	1	1	1	1	1	1	1	1	1	1	3.1	3.1	3.1	33.416	319	319	0.0091743	6.4	3.1	3.1	95886000	39526000	56360000	15981000	6587700	9393300	0	51887000	2	3	5				78	79	True	88	257;258	464;465;466;467;468	466
tr|Q6N5Z3|Q6N5Z3_RHOPADUF3597domain-containingproteinOS=Rhodopseudomonaspalustris(strainATCCBAA-98/CGA009)OX=258594GN=RPA2825PE=1SV=1	tr|Q6N5Z3|Q6N5Z3_RHOPADUF3597domain-containingproteinOS=Rhodopseudomonaspalustris(strainATCCBAA-98/CGA009)OX=258594GN=RPA2825PE=1SV=1	1	1	1	tr|Q6N5Z3|Q6N5Z3_RHOPA DUF3597 domain-containing protein OS=Rhodopseudomonas palustris (strain ATCC BAA-98 / CGA009) OX=258594 GN=RPA2825 PE=1 SV=1	1	1	1	1	0	1	0	1	0	1	6.2	6.2	6.2	13.431	130	130	1	-2	0	6.2	5608600	0	5608600	1402200	0	1402200	0	5163500	0	1	1	+			79	436	True	482	1683	2854	2854	45	74
tr|Q6N6B0|Q6N6B0_RHOPAPossiblefusaricacidresistancepumpOS=Rhodopseudomonaspalustris(strainATCCBAA-98/CGA009)OX=258594GN=RPA2708PE=4SV=1	tr|Q6N6B0|Q6N6B0_RHOPAPossiblefusaricacidresistancepumpOS=Rhodopseudomonaspalustris(strainATCCBAA-98/CGA009)OX=258594GN=RPA2708PE=4SV=1	1	1	1	tr|Q6N6B0|Q6N6B0_RHOPA Possible fusaric acid resistance pump OS=Rhodopseudomonas palustris (strain ATCC BAA-98 / CGA009) OX=258594 GN=RPA2708 PE=4 SV=1	1	1	1	1	0	1	0	1	0	1	1.6	1.6	1.6	75.471	697	697	0.0084034	6.053	0	1.6	5855800	0	5855800	195190	0	195190	0	5391100	0	2	2				80	46	True	51	168	341;342	341
tr|Q6N6G7|Q6N6G7_RHOPAVOCdomain-containingproteinOS=Rhodopseudomonaspalustris(strainATCCBAA-98/CGA009)OX=258594GN=RPA2648PE=4SV=1	tr|Q6N6G7|Q6N6G7_RHOPAVOCdomain-containingproteinOS=Rhodopseudomonaspalustris(strainATCCBAA-98/CGA009)OX=258594GN=RPA2648PE=4SV=1	1	1	1	tr|Q6N6G7|Q6N6G7_RHOPA VOC domain-containing protein OS=Rhodopseudomonas palustris (strain ATCC BAA-98 / CGA009) OX=258594 GN=RPA2648 PE=4 SV=1	1	1	1	1	1	1	1	1	1	1	3.8	3.8	3.8	27.818	260	260	0.0089286	6.1999	3.8	3.8	19301000	8258700	11042000	1206300	516170	690150	0	10166000	1	1	2				81	136	True	149	395;396	651;652	652
tr|Q6N739|Q6N739_RHOPAUncharacterizedproteinOS=Rhodopseudomonaspalustris(strainATCCBAA-98/CGA009)OX=258594GN=RPA2424PE=4SV=1	tr|Q6N739|Q6N739_RHOPAUncharacterizedproteinOS=Rhodopseudomonaspalustris(strainATCCBAA-98/CGA009)OX=258594GN=RPA2424PE=4SV=1	1	1	1	tr|Q6N739|Q6N739_RHOPA Uncharacterized protein OS=Rhodopseudomonas palustris (strain ATCC BAA-98 / CGA009) OX=258594 GN=RPA2424 PE=4 SV=1	1	1	1	1	1	1	1	1	1	1	3.2	3.2	3.2	52.474	475	475	0.0096154	6.657	3.2	3.2	5417000	3132800	2284300	186790	108030	78768	0	2103000	1	1	2				85	132	True	145	389;390	640;641	640
tr|Q6N8C1|Q6N8C1_RHOPAGlutathionereductaseOS=Rhodopseudomonaspalustris(strainATCCBAA-98/CGA009)OX=258594GN=gorPE=3SV=1	tr|Q6N8C1|Q6N8C1_RHOPAGlutathionereductaseOS=Rhodopseudomonaspalustris(strainATCCBAA-98/CGA009)OX=258594GN=gorPE=3SV=1	1	1	1	tr|Q6N8C1|Q6N8C1_RHOPA Glutathione reductase OS=Rhodopseudomonas palustris (strain ATCC BAA-98 / CGA009) OX=258594 GN=gor PE=3 SV=1	1	1	1	1	1	1	1	1	1	1	2.8	2.8	2.8	49.426	461	461	0	7.4129	2.8	2.8	13940000	6626000	7313700	557590	265040	292550	0	6733300	1	1	2				90	84	True	93	264;265	478;479	479
tr|Q6N8C9|Q6N8C9_RHOPAIron-sulfurclustercarrierproteinOS=Rhodopseudomonaspalustris(strainATCCBAA-98/CGA009)OX=258594GN=RPA1974PE=3SV=1	tr|Q6N8C9|Q6N8C9_RHOPAIron-sulfurclustercarrierproteinOS=Rhodopseudomonaspalustris(strainATCCBAA-98/CGA009)OX=258594GN=RPA1974PE=3SV=1	1	1	1	tr|Q6N8C9|Q6N8C9_RHOPA Iron-sulfur cluster carrier protein OS=Rhodopseudomonas palustris (strain ATCC BAA-98 / CGA009) OX=258594 GN=RPA1974 PE=3 SV=1	1	1	1	1	1	1	1	1	1	1	3.8	3.8	3.8	38.669	370	370	0.0087719	6.1476	3.8	3.8	0	0	0	0	0	0	0	0	2	4	6				91	280	True	303	929;930;931;932;933;934	1507;1508;1509;1510;1511;1512	1507
tr|Q6N8R3|Q6N8R3_RHOPADihydropteroatesynthaseOS=Rhodopseudomonaspalustris(strainATCCBAA-98/CGA009)OX=258594GN=folPPE=3SV=1	tr|Q6N8R3|Q6N8R3_RHOPADihydropteroatesynthaseOS=Rhodopseudomonaspalustris(strainATCCBAA-98/CGA009)OX=258594GN=folPPE=3SV=1	1	1	1	tr|Q6N8R3|Q6N8R3_RHOPA Dihydropteroate synthase OS=Rhodopseudomonas palustris (strain ATCC BAA-98 / CGA009) OX=258594 GN=folP PE=3 SV=1	1	1	1	1	0	1	0	1	0	1	3.9	3.9	3.9	29.872	285	285	0.0093458	6.5031	0	3.9	7541800	0	7541800	502790	0	502790	0	6943300	0	1	1				93	65	True	70	216	405	405	46	140
tr|Q6N8Z8|Q6N8Z8_RHOPAAP_endonuc_2domain-containingproteinOS=Rhodopseudomonaspalustris(strainATCCBAA-98/CGA009)OX=258594GN=RPA1753PE=3SV=1	tr|Q6N8Z8|Q6N8Z8_RHOPAAP_endonuc_2domain-containingproteinOS=Rhodopseudomonaspalustris(strainATCCBAA-98/CGA009)OX=258594GN=RPA1753PE=3SV=1	1	1	1	tr|Q6N8Z8|Q6N8Z8_RHOPA AP_endonuc_2 domain-containing protein OS=Rhodopseudomonas palustris (strain ATCC BAA-98 / CGA009) OX=258594 GN=RPA1753 PE=3 SV=1	1	1	1	1	1	0	1	0	1	0	5.4	5.4	5.4	29.027	259	259	0	7.0106	5.4	0	4802200	4802200	0	320150	320150	0	4802200	0	1	0	1				94	255	True	278	866	1406	1406
tr|Q6N956|Q6N956_RHOPASuperoxidedismutaseOS=Rhodopseudomonaspalustris(strainATCCBAA-98/CGA009)OX=258594GN=sodBPE=3SV=1	tr|Q6N956|Q6N956_RHOPASuperoxidedismutaseOS=Rhodopseudomonaspalustris(strainATCCBAA-98/CGA009)OX=258594GN=sodBPE=3SV=1	1	1	1	tr|Q6N956|Q6N956_RHOPA Superoxide dismutase OS=Rhodopseudomonas palustris (strain ATCC BAA-98 / CGA009) OX=258594 GN=sodB PE=3 SV=1	1	1	1	1	1	1	1	1	1	1	4.5	4.5	4.5	22.515	198	198	0.008547	6.0846	4.5	4.5	93400000	49181000	44219000	7783400	4098400	3684900	48992000	40899000	2	2	4				96	93	True	103	291;292;293;294	514;515;516;517	517
tr|Q6N9L4|Q6N9L4_RHOPALHCdomain-containingproteinOS=Rhodopseudomonaspalustris(strainATCCBAA-98/CGA009)OX=258594GN=pufAPE=4SV=1	tr|Q6N9L4|Q6N9L4_RHOPALHCdomain-containingproteinOS=Rhodopseudomonaspalustris(strainATCCBAA-98/CGA009)OX=258594GN=pufAPE=4SV=1	1	1	1	tr|Q6N9L4|Q6N9L4_RHOPA LHC domain-containing protein OS=Rhodopseudomonas palustris (strain ATCC BAA-98 / CGA009) OX=258594 GN=pufA PE=4 SV=1	1	1	1	1	1	1	1	1	1	1	12.7	12.7	12.7	7.2417	63	63	0	16.944	12.7	12.7	10582000000	6482700000	4099400000	2645500000	1620700000	1024900000	6333000000	3034800000	5	4	9				98	120	True	132	355;356;357;358;359;360;361	596;597;598;599;600;601;602;603;604;605	597
tr|Q6N9L5|Q6N9L5_RHOPALHCdomain-containingproteinOS=Rhodopseudomonaspalustris(strainATCCBAA-98/CGA009)OX=258594GN=pufBPE=3SV=1	tr|Q6N9L5|Q6N9L5_RHOPALHCdomain-containingproteinOS=Rhodopseudomonaspalustris(strainATCCBAA-98/CGA009)OX=258594GN=pufBPE=3SV=1	1	1	1	tr|Q6N9L5|Q6N9L5_RHOPA LHC domain-containing protein OS=Rhodopseudomonas palustris (strain ATCC BAA-98 / CGA009) OX=258594 GN=pufB PE=3 SV=1	1	1	1	1	1	0	1	0	1	0	21.5	21.5	21.5	7.2784	65	65	0.009434	6.5202	21.5	0	3295800	3295800	0	1098600	1098600	0	3295800	0	1	0	1				99	354	True	395	1253	2004	2004
tr|Q6NAD0|Q6NAD0_RHOPAFormamideamidohydrolaseOS=Rhodopseudomonaspalustris(strainATCCBAA-98/CGA009)OX=258594GN=fmdAPE=4SV=1	tr|Q6NAD0|Q6NAD0_RHOPAFormamideamidohydrolaseOS=Rhodopseudomonaspalustris(strainATCCBAA-98/CGA009)OX=258594GN=fmdAPE=4SV=1	1	1	1	tr|Q6NAD0|Q6NAD0_RHOPA Formamide amidohydrolase OS=Rhodopseudomonas palustris (strain ATCC BAA-98 / CGA009) OX=258594 GN=fmdA PE=4 SV=1	1	1	1	1	1	1	1	1	1	1	4.4	4.4	4.4	44.363	409	409	0	7.0927	4.4	4.4	14069000	4705700	9363200	740470	247670	492800	0	8620100	1	0	1				104	128	True	141	379;380	628;629	628
tr|Q6NAG6|Q6NAG6_RHOPAUncharacterizedproteinOS=Rhodopseudomonaspalustris(strainATCCBAA-98/CGA009)OX=258594GN=RPA1219PE=4SV=1	tr|Q6NAG6|Q6NAG6_RHOPAUncharacterizedproteinOS=Rhodopseudomonaspalustris(strainATCCBAA-98/CGA009)OX=258594GN=RPA1219PE=4SV=1	1	1	1	tr|Q6NAG6|Q6NAG6_RHOPA Uncharacterized protein OS=Rhodopseudomonas palustris (strain ATCC BAA-98 / CGA009) OX=258594 GN=RPA1219 PE=4 SV=1	1	1	1	1	1	1	1	1	1	1	6.5	6.5	6.5	21.593	216	216	0	7.497	6.5	6.5	9779900	4829800	4950100	1630000	804960	825020	0	4557300	1	1	2				106	145	True	158	441;442	760;761	761
tr|Q6NAN7|Q6NAN7_RHOPAUncharacterizedproteinOS=Rhodopseudomonaspalustris(strainATCCBAA-98/CGA009)OX=258594GN=RPA1146PE=4SV=1	tr|Q6NAN7|Q6NAN7_RHOPAUncharacterizedproteinOS=Rhodopseudomonaspalustris(strainATCCBAA-98/CGA009)OX=258594GN=RPA1146PE=4SV=1	1	1	1	tr|Q6NAN7|Q6NAN7_RHOPA Uncharacterized protein OS=Rhodopseudomonas palustris (strain ATCC BAA-98 / CGA009) OX=258594 GN=RPA1146 PE=4 SV=1	1	1	1	1	0	1	0	1	0	1	4.6	4.6	4.6	29.041	284	284	0	8.406	0	4.6	6673100	0	6673100	606640	0	606640	0	6143500	0	3	3				108	64	True	69	215	402;403;404	403
tr|Q6NAQ8|Q6NAQ8_RHOPAPeptidoglycan-associatedproteinOS=Rhodopseudomonaspalustris(strainATCCBAA-98/CGA009)OX=258594GN=palPE=3SV=1	tr|Q6NAQ8|Q6NAQ8_RHOPAPeptidoglycan-associatedproteinOS=Rhodopseudomonaspalustris(strainATCCBAA-98/CGA009)OX=258594GN=palPE=3SV=1	1	1	1	tr|Q6NAQ8|Q6NAQ8_RHOPA Peptidoglycan-associated protein OS=Rhodopseudomonas palustris (strain ATCC BAA-98 / CGA009) OX=258594 GN=pal PE=3 SV=1	1	1	1	1	1	1	1	1	1	1	7.3	7.3	7.3	17.81	165	165	0	7.0973	7.3	7.3	20373000	8524900	11848000	2546600	1065600	1481000	0	10908000	1	1	2				109	502	True	556	2061;2062	3602;3603	3603
tr|Q6NBQ0|Q6NBQ0_RHOPAUncharacterizedproteinOS=Rhodopseudomonaspalustris(strainATCCBAA-98/CGA009)OX=258594GN=RPA0778PE=4SV=1	tr|Q6NBQ0|Q6NBQ0_RHOPAUncharacterizedproteinOS=Rhodopseudomonaspalustris(strainATCCBAA-98/CGA009)OX=258594GN=RPA0778PE=4SV=1	1	1	1	tr|Q6NBQ0|Q6NBQ0_RHOPA Uncharacterized protein OS=Rhodopseudomonas palustris (strain ATCC BAA-98 / CGA009) OX=258594 GN=RPA0778 PE=4 SV=1	1	1	1	1	1	1	1	1	1	1	8.3	8.3	8.3	14.337	133	133	0	7.1565	8.3	8.3	138030000	69840000	68193000	27607000	13968000	13639000	0	62781000	1	1	2				112	115	True	127	346;347	587;588	587
tr|Q6NCQ4|Q6NCQ4_RHOPAUncharacterizedproteinOS=Rhodopseudomonaspalustris(strainATCCBAA-98/CGA009)OX=258594GN=RPA0415PE=3SV=1	tr|Q6NCQ4|Q6NCQ4_RHOPAUncharacterizedproteinOS=Rhodopseudomonaspalustris(strainATCCBAA-98/CGA009)OX=258594GN=RPA0415PE=3SV=1	1	1	1	tr|Q6NCQ4|Q6NCQ4_RHOPA Uncharacterized protein OS=Rhodopseudomonas palustris (strain ATCC BAA-98 / CGA009) OX=258594 GN=RPA0415 PE=3 SV=1	1	1	1	1	0	1	0	1	0	1	7.9	7.9	7.9	18.327	165	165	0	7.9267	0	7.9	37635000	0	37635000	5376400	0	5376400	0	34648000	0	1	1				116	318	True	357	1153	1867	1867
tr|Q6ND34|Q6ND34_RHOPAAmmoniumtransporterOS=Rhodopseudomonaspalustris(strainATCCBAA-98/CGA009)OX=258594GN=amtB2PE=3SV=1	tr|Q6ND34|Q6ND34_RHOPAAmmoniumtransporterOS=Rhodopseudomonaspalustris(strainATCCBAA-98/CGA009)OX=258594GN=amtB2PE=3SV=1	1	1	1	tr|Q6ND34|Q6ND34_RHOPA Ammonium transporter OS=Rhodopseudomonas palustris (strain ATCC BAA-98 / CGA009) OX=258594 GN=amtB2 PE=3 SV=1	1	1	1	1	1	1	1	1	1	1	2.3	2.3	2.3	49.789	480	480	0.0095238	6.6005	2.3	2.3	54046000	28079000	25967000	6005100	3119800	2885200	0	23906000	1	1	2				120	26	True	29	118;119	271;272	271
